# Supplementary material for: Heterobimetallic 21,23-dimetallaporphyrin: activation of metal–metal interactions within the porphyrinoid macrocycle
Source: Royal Society of Chemistry journal article supplement (doi:10.1039/d3cc01367g), 2023-01-01
Supplement: d3cc01367g1.pdf [file d3cc01367g1.pdf]

## Supporting Information

### Heterobimetallic 21,23-dimetallaporphyrin: activation of metal-metal interactions within the porphyrinoid macrocycle

Grzegorz Vetter, Agata Białońska, Aneta Jezierska, Jarosław J. Panek and Ewa Pacholska-Dudziak\*

Department of Chemistry University of Wrocław ul. Joliot-Curie 14, 50-383 Wrocław, Poland

E-mail: ewa.dudziak@uwr.edu.pl

#### Contents:

|                                                                                 |    |
|---------------------------------------------------------------------------------|----|
| 1. Materials and methods .....                                                  | 3  |
| 2. Synthesis and characterization .....                                         | 3  |
| 3. Computational methodology .....                                              | 15 |
| 3.1. Calculations focused on metal–metal bond analysis .....                    | 15 |
| 3.2. Calculations of possible structures of <b>4-Rh(CO)<sub>2</sub>Cl</b> ..... | 15 |
| 4. Computational results .....                                                  | 15 |
| 4.1. Energetic and structural considerations .....                              | 15 |
| 4.2. Metal–metal bonding – QTAIM and ELF description .....                      | 17 |
| 4.3. Natural Bond Orbital (NBO) parameters for the metal–metal bonding .....    | 19 |
| 4.4. Calculations of possible structures of <b>4-Rh(CO)<sub>2</sub>Cl</b> ..... | 20 |
| 5. References .....                                                             | 30 |

## List of figures and tables:

|                                                                                                                                                        |    |
|--------------------------------------------------------------------------------------------------------------------------------------------------------|----|
| <b>Figure S1.</b> HRMS ESI (+MS) spectra of <b>4-Rh(CO)<sub>2</sub>Cl</b> .....                                                                        | 6  |
| <b>Figure S2.</b> <sup>1</sup> H NMR spectrum of <b>4-Rh(CO)<sub>2</sub>Cl</b> .....                                                                   | 6  |
| <b>Figure S3.</b> <sup>1</sup> H NMR spectrum of <b>5</b> .....                                                                                        | 7  |
| <b>Figure S4.</b> Variable temperature <sup>1</sup> H NMR spectra of <b>5</b> .....                                                                    | 8  |
| <b>Figure S5.</b> <sup>13</sup> C NMR spectrum of <b>5</b> .....                                                                                       | 9  |
| <b>Figure S6.</b> HRMS ESI (+MS) spectra of <b>5</b> .....                                                                                             | 10 |
| <b>Figure S7.</b> Variable temperature <sup>1</sup> H NMR spectra of <b>5-Cl<sub>2</sub></b> .....                                                     | 11 |
| <b>Figure S8.</b> <sup>13</sup> C NMR spectrum of <b>5-Cl<sub>2</sub></b> .....                                                                        | 12 |
| <b>Figure S9.</b> HRMS ESI (+MS) spectra of <b>5-Cl<sub>2</sub></b> .....                                                                              | 13 |
| <b>Figure S10.</b> Absorption spectrum of <b>4-Rh(CO)<sub>2</sub>Cl</b> .....                                                                          | 13 |
| <b>Figure S11.</b> X-ray structure of <b>5</b> .....                                                                                                   | 14 |
| <b>Figure S12.</b> Angles around the central part of <b>5</b> .....                                                                                    | 14 |
| <b>Table S1.</b> Energies of the DFT-optimized structures of <b>1</b> , <b>5</b> and <b>5-Cl<sub>2</sub></b> and metal–metal distances .....           | 16 |
| <b>Figure S13.</b> Topology of electron density in the vicinity of metal centers of <b>1</b> , <b>5</b> and <b>5-Cl<sub>2</sub></b> ..                 | 17 |
| <b>Table S2.</b> QTAIM parameters of the metal–metal bond critical points .....                                                                        | 18 |
| <b>Table S3.</b> QTAIM parameters of selected BCPs in <b>5</b> .....                                                                                   | 18 |
| <b>Figure S14.</b> Electron Localization Function (ELF) along the metal–metal line in <b>1</b> , <b>5</b> and <b>5-Cl<sub>2</sub></b> .....            | 19 |
| <b>Table S4.</b> NBO parameters for the metal–metal interactions .....                                                                                 | 20 |
| <b>Figure S15.</b> Energy diagram for conformational interconversions of <b>5</b> and <b>5-Cl<sub>2</sub></b> .....                                    | 20 |
| <b>Figure S16.</b> DFT-optimized possible structures of <b>4-Rh(CO)<sub>2</sub>Cl</b> .....                                                            | 21 |
| <b>Table S5.</b> Cartesian coordinates of DFT optimized structures of <b>5</b> and <b>5-Cl<sub>2</sub></b> .....                                       | 21 |
| <b>Table S6.</b> Cartesian coordinates of DFT optimized transition states [ <b>5</b> ] <sup>‡</sup> and [ <b>5-Cl<sub>2</sub></b> ] <sup>‡</sup> ..... | 23 |
| <b>Table S7.</b> Cartesian coordinates of DFT optimized geometries of <b>4-Rh(CO)<sub>2</sub>Cl</b> .....                                              | 24 |

## 1. Materials and methods

All reagents and solvents were purchased from commercial sources and used without further purification. Dichloromethane was distilled from calcium hydride. Column chromatography was carried out on Macherey-Nagel silica gel 60. NMR spectra were recorded on Bruker Avance III 500 MHz and 600 MHz spectrometers. Chemical shifts were reported in ppm with reference to residual protons and carbons of CDCl<sub>3</sub> ( $\delta$  7.26 ppm in <sup>1</sup>H NMR,  $\delta$  77.2 ppm in <sup>13</sup>C NMR), CD<sub>2</sub>Cl<sub>2</sub> ( $\delta$  5.32 ppm in <sup>1</sup>H NMR,  $\delta$  54.0 ppm in <sup>13</sup>C NMR) and toluene-d<sub>8</sub> ( $\delta$  2.09 ppm in <sup>1</sup>H NMR). UV-Vis spectra were recorded on a Varian Carry 60 spectrophotometer equipped with a Peltier temperature controller and stirrer using 1 cm path length optical glass cuvettes. Mass spectra were carried out on a Bruker Apex-ultra FTMS and Bruker micrOTOF-Q spectrometers using electrospray ionization.

Single-crystal X-ray diffraction data were collected at 100 K, on Xcalibur (Onyx CCD detector) (**5-Cl<sub>2</sub>**) or XtaLAB Synergy R, DW system (HyPix-Arc 150) (**5**)  $\kappa$ -geometry diffractometers using Cu K $\alpha$  radiation. Data reduction and analysis were carried out with the CrysAlis Pro programs (CrysAlis PRO. *CrysAlisPro: Rigaku Oxford Diffraction 1.171.41.80a*). The structures were solved by direct methods and refined with the full-matrix least-squares technique using the *SHELXS*<sup>1</sup> and *Shelxl-2018/3*<sup>2</sup> programs. Hydrogen atoms were placed at calculated positions. Before the last cycle of refinement, all H atoms were fixed and were allowed to ride on their parent atoms. Anisotropic displacement parameters were refined for all non-hydrogen atoms. However, SIMU or ISOR restraints were applied in **5** and additionally, EADP constrains in **5-Cl<sub>2</sub>**. The Rh–C(carbonyl) distance of the disordered components was restrained applying the SADI command. The occupancy factors for the disordered components were refined.

Electrochemical measurements were performed by means of Autolab PGSTAT100N (Metrohm) potentiostat/galvanostat system for dichloromethane solutions with a glassy carbon, a platinum wire, and Au as the working, auxiliary, and reference electrodes, respectively. Tetrabutylammonium hexafluorophosphate ([Bu<sub>4</sub>N]PF<sub>6</sub>) was used as a supporting electrolyte in cyclic voltammetry measurements and tetrabutylammonium perchlorate ([Bu<sub>4</sub>N]ClO<sub>4</sub>) was used in differential pulse voltammetry. The given potentials were referenced with the ferrocene/ferrocenium couple used as an internal standard.

## 2. Synthesis and characterization

**Synthesis of 4:**<sup>3</sup> 30 mg of 5,10,15,20-tetrakis(4-methoxyphenyl)-21,23-ditelluraporphyrin, **3**,<sup>4</sup> (3.1·10<sup>-5</sup> mol) and 22 mg (4.7·10<sup>-5</sup> mol) of Pt(PhCN)<sub>2</sub>Cl<sub>2</sub> were dissolved in 15 ml toluene. The nitrogen was bubbled through the mixture for 15 minutes, and the solution was refluxed for another 15 minutes. The solvent was evaporated, and the product was purified by column chromatography on SiO<sub>2</sub>, and **4** was eluted as a red band with 1% ethanol in CH<sub>2</sub>Cl<sub>2</sub> (14,3 mg, 45%). <sup>1</sup>H NMR (CDCl<sub>3</sub>, 300 K, 500 MHz):  $\delta$  10.75 (d, <sup>3</sup>J<sub>HH</sub> = 4.5 Hz, <sup>3</sup>J<sub>PtH</sub> = 84 Hz, 1H,

platinacycle), 10.26 (d,  $^3J_{\text{HH}} = 4.5$  Hz,  $^3J_{\text{PtH}} = 98$  Hz, 1H, platinacycle), 9.99 (d,  $^3J_{\text{HH}} = 6.8$  Hz, 1H, tell), 9.90 (d,  $^3J_{\text{HH}} = 6.8$  Hz, 1H, tell), 8.62 (AB,  $^3J_{\text{HH}} = 4.8$  Hz, 2H, pyr), 8.37 (d,  $^3J_{\text{HH}} = 4.4$  Hz, 1H, pyr), 8.20 (m, 2H, *o*-Ph), 8.14 (d,  $^3J_{\text{HH}} = 4.4$  Hz, 1H, pyr), 8.11 (m, 2H, *o*-Ph), 8.07 (m, 2H, *o*-Ph), 8.00 (m, 2H, *o*-Ph), 7.38 (m, 2H, *m*-Ph), 7.31 (m, 4H, *m*-Ph), 7.27 (m, 2H, *m*-Ph), 4.10 (s, 3H, OMe), 4.09 (s, 3H, OMe), 4.06 (s, 3H, OMe), 4.03 (s, 3H, OMe); **UV-Vis (nm)**: 864, 791, 724, 526, 481, 374, 317; **HRMS (ESI)  $m/z$**  = 1030.1474, calc. for  $\text{C}_{48}\text{H}_{36}\text{N}_2\text{O}_4^{130}\text{Te}^{195}\text{Pt}$ ,  $[\text{M}+\text{H}]^+$ : 1030.1469.

**Synthesis of 4-Rh(CO)<sub>2</sub>Cl**: Solution of 21-platina-23-telluraporphyrin **4** (10 mg,  $9.7 \cdot 10^{-6}$  mol) and  $[\text{Rh}(\text{CO})_2\text{Cl}]_2$  (3.8 mg,  $9.7 \cdot 10^{-6}$  mol) in  $\text{CDCl}_3$  (0.6 ml) was shaken in NMR tube for five minutes. Formation of **4-Rh(CO)<sub>2</sub>Cl** was observed in the  $^1\text{H}$  NMR spectrum. At room temperature **4-Rh(CO)<sub>2</sub>Cl** converted in the  $\text{CDCl}_3$  solution to a mixture of products, including **5**, in several days.  **$^1\text{H}$  NMR ( $\text{CDCl}_3$ , 280 K, 600 MHz)**:  $\delta$  10.43 (d,  $^3J_{\text{HH}} = 4.5$  Hz, 1H, platinacycle), 9.94 (d,  $^3J_{\text{HH}} = 4.5$  Hz, 1H, platinacycle), 9.66 (AB, 2H, tell), 8.91 (d,  $^3J_{\text{HH}} = 4.9$  Hz, 1H, pyr), 8.67 (d,  $^3J_{\text{HH}} = 4.9$  Hz, 1H, pyr), 8.62 (m, 1H, *o*-Anis), 8.40 (m, 2H, *o*-Anis), 8.26 (d,  $^3J_{\text{HH}} = 4.5$  Hz, 1H, pyr), 8.17 (m, 2H, *o*-Anis), 8.09 (m, 2H, *o*-Anis), 7.92 (d,  $^3J_{\text{HH}} = 4.5$  Hz, 1H, pyr), 7.79 (m, 1H, *o*-Anis), 7.46 (m, 2H, *m*-Anis), 7.45 (m, 1H, *m*-Anis), 7.36 (m, 4H, *m*-Anis), 7.21 (m, 1H, *m*-Anis), 4.12 (s, 3H, OMe), 4.09 (s, 3H, OMe), 4.07 (s, 3H, OMe), 4.05 (s, 3H, OMe);  **$^{13}\text{C}$  NMR ( $\text{CDCl}_3$ , 280 K, 150 MHz)**:  $\delta$  184.1 ( $\alpha$ -platinacycle), 178.2 (d,  $^1J_{\text{RhCO}} = 77$  Hz, CO), 174.7 ( $\alpha$ -pyr), 171.3 ( $\beta$ -platinacycle), 165.6 ( $\alpha$ -pyr), 163.4 ( $\alpha$ -pyr), 161.8 (para), 160.8 (para), 160.5 (para), 160.4 (para), 157.0 ( $\alpha$ -platinacycle), 152.4 (meso), 151.4 ( $\alpha$ -tell), 149.7 ( $\alpha$ -tell), 148.1 ( $\beta$ -tell), 147.2 ( $\beta$ -platinacycle), 146.6 ( $\alpha$ -pyr), 144.3 (meso), 143.0 (meso), 142.4 ( $\beta$ -pyr), 139.6 ( $\beta$ -tell, meso), 138.5 (*o*-Anis), 137.1 (*o*-Anis), 136.7 (*o*-Anis), 136.3 (ipso), 136.0 (*o*-Anis), 135.9 (ipso), 134.1 (*o*-Anis), 131.4 (ipso), 130.9 ( $\beta$ -pyr), 129.0 ( $\beta$ -pyr), 128.5 ( $\beta$ -pyr), 128.3 (ipso), 115.3 (*m*-Anis), 114.8 (*m*-Anis), 113.4 (*m*-Anis), 56.0 (OMe), 55.9 (OMe), 55.8 (OMe); **UV-Vis, nm**: 480 (sh), 540 (sh), 725 (sh), 873, 955; **HRMS (ESI)  $m/z$**  = 1188.0283, calc. for  $\text{C}_{48}\text{H}_{36}\text{N}_2\text{O}_4^{130}\text{Te}^{195}\text{PtRh}(\text{CO})_2$ ,  $[\text{M}-\text{Cl}]^+$ : 1188.0345.

**Synthesis of 5**: 20 mg ( $1.9 \cdot 10^{-5}$  mol) of 21-platina-23-telluraporphyrin **4** and 7.6 mg ( $1.9 \cdot 10^{-5}$  mol) of  $[\text{Rh}(\text{CO})_2\text{Cl}]_2$  were dissolved in 15 ml of toluene. Nitrogen was bubbled through the mixture for 15 minutes and the solution was stirred for 5 days at room temperature. After evaporation of the solvent, the product was purified by column chromatography on  $\text{SiO}_2$ , and product **5** was eluted with  $\text{CH}_2\text{Cl}_2$  as a red band (8.1 mg, 40%).  **$^1\text{H}$  NMR ( $\text{CD}_2\text{Cl}_2$ , 300 K, 600 MHz)**:  $\delta$  10.07 (bd, 1H, rhodacycle), 9.90 (bd, 1H, platinacycle), 9.61 (bd, 1H, platinacycle), 9.45 (bd, 1H, rhodacycle), 8.65 (bd, 1H, pyr), 8.58 (bd, 1H, pyr), 8.42 (bd, 1H, pyr), 8.32 (bd, 1H, pyr), 8.22–8.08 (m, 8H, *o*-Anis), 7.38–7.28 (m, 8H, *m*-Anis), 4.08 (bs, 6H, OMe), 4.05 (s, 3H, OMe), 4.01 (s, 3H, OMe);  **$^1\text{H}$  NMR ( $\text{CD}_2\text{Cl}_2$ , 220 K, 600 MHz)**:  $\delta$  10.12 (dd,  $^3J_{\text{HH}} = 5.3$  Hz,  $^3J_{\text{RhH}} = 1.5$  Hz, 1H, rhodacycle), 9.92 (d,  $^3J_{\text{HH}} = 4.2$  Hz, 1H, platinacycle), 9.65 (d,  $^3J_{\text{HH}} = 4.2$  Hz, 1H, platinacycle), 9.52 (dd,  $^3J_{\text{HH}} = 5.3$  Hz,  $^3J_{\text{RhH}} = 1.5$  Hz, 1H, rhodacycle), 8.63 (AB, 2H, pyr), 8.51 (m, 1H, *o*-Anis), 8.42 (d,  $^3J_{\text{HH}} = 4.5$  Hz, 1H, pyr), 8.41 (m, 1H, *o*-Anis), 8.26 (d,  $^3J_{\text{HH}} = 4.6$  Hz, 1H, pyr), 8.23 (m, 2H, *o*-Anis), 8.05 (m, 2H, *o*-Anis), 7.73 (m, 1H, *o*-

Anis), 7.58 (m, 1H, *o*-Anis), 7.41 (m, 1H, *m*-Anis), 7.36 (m, 2H, *m*-Anis), 7.34 (m, 1H, *m*-Anis), 7.23 (m, 3H, *m*-Anis), 7.17 (m, 1H, *m*-Anis), 4.03 (s, 3H, OMe), 4.01 (s, 3H, OMe), 4.00 (s, 3H, OMe), 3.95 (s, 3H, OMe); **<sup>13</sup>C NMR (CD<sub>2</sub>Cl<sub>2</sub>, 220 K, 150 MHz):** δ 177.3 (d, <sup>1</sup>J<sub>RhCO</sub> = 79 Hz, CO), 171.7 (β-platinacycle), 167.3 (α-pyrr), 167.2 (meso), 165.2 (d, <sup>1</sup>J<sub>RhC</sub> = 26 Hz, α-rhodacycle), 163.4 (α-pyrr), 162.9 (d, <sup>1</sup>J<sub>RhC</sub> = 26 Hz, α-rhodacycle), 159.7 (para), 159.5 (para), 159.0 (para), 157.1 (α-platinacycle), 154.6 (β-rhodacycle), 150.3 (α-pyrr), 150.2 (α-pyrr), 147.8 (meso), 142.2 (β-platinacycle), 142.1 (β-pyrr), 140.0 (meso), 139.6 (α-platinacycle), 139.5 (β-rhodacycle), 139.0 (β-pyrr), 137.8 (meso), 136.9 (ipso), 136.2 (*o*-Anis), 135.8 (*o*-Anis), 135.3 (*o*-Anis), 135.0 (ipso), 134.6 (*o*-Anis), 134.5 (*o*-Anis), 134.3 (*o*-Anis), 133.8 (*o*-Anis), 128.3 (ipso), 126.6 (β-pyrr), 122.6 (β-pyrr), 114.5 (*m*-Anis), 114.3 (*m*-Anis), 112.6 (*m*-Anis), 112.4 (*m*-Anis), 112.0 (*m*-Anis), 111.7 (*m*-Anis), 55.6 (OMe); **UV-Vis (nm, logε):** 943 (3.6), 766 (3.8), 500 (4.5); **HRMS (ESI) *m/z*** = 1030.1380, calc. for C<sub>49</sub>H<sub>36</sub>N<sub>2</sub>O<sub>5</sub>Rh<sup>195</sup>Pt, [M-Cl]<sup>+</sup>: 1030.1326. **Crystal data for 5:** 6(C<sub>49</sub>H<sub>36</sub>ClN<sub>2</sub>O<sub>5</sub>PtRh), C<sub>6</sub>H<sub>14</sub>, *M* = 6483.65, triclinic, *P*-1, *a* = 13.262(3) Å, *b* = 15.370(2) Å, *c* = 31.061(3) Å, α = 92.03(2)°, β = 96.66(3)°, γ = 93.88(2)°, *V* = 6268.3(18) Å<sup>3</sup>, *Z* = 1, *D<sub>c</sub>* = 1.718 Mg m<sup>-3</sup>, *T* = 80(2) K, *R* = 0.0797, *wR* = 0.1817 (12443 reflections with *I* > 2σ(*I*)) for 1878 variables, CCDC 2241158.

**Synthesis of 5-Cl<sub>2</sub>:** To the solution of **5** (10 mg, 8.8·10<sup>-6</sup> mol) in CDCl<sub>3</sub> (0.6 ml) in NMR tube, chlorine gas (8.8·10<sup>-6</sup> mol) was added and the mixture was shaken to give **5-Cl<sub>2</sub>** (10 mg, 100%). Caution: chlorine gas is toxic and corrosive and must be handled according to appropriate safety rules. **<sup>1</sup>H NMR (CDCl<sub>3</sub>, 300 K, 500 MHz):** δ 10.08 (d, <sup>3</sup>J<sub>RhH</sub> = 1.2 Hz, 2H, rhodacycle), 9.61 (s, <sup>3</sup>J<sub>PtH</sub> = 51 Hz, 2H, platinacycle), 8.59 (d, <sup>3</sup>J<sub>HH</sub> = 4.9 Hz, 2H, pyrr), 8.53 (d, <sup>3</sup>J<sub>HH</sub> = 4.9 Hz, 2H, pyrr), 8.21 (m, 8H, *o*-Anis), 7.36 (m, 8H, *m*-Anis), 4.10 (s, 6H, OMe), 4.09 (s, 6H, OMe); **<sup>13</sup>C NMR (CDCl<sub>3</sub>, 300 K, 150 MHz):** δ 171.6 (d, <sup>1</sup>J<sub>RhC</sub> = 25 Hz, α-rhodacycle), 170.1 (d, <sup>1</sup>J<sub>RhCO</sub> = 71 Hz, CO), 160.6 (para), 160.4 (para), 159.3 (α-pyrr), 158.5 (α-pyrr), 152.3 (β-rhodacycle), 150.1 (α-platinacycle), 148.8 (β-platinacycle), 144.7 (meso), 139.6 (meso), 135.6 (*o*-Anis), 134.1 (β-pyrr), 133.9 (β-pyrr), 132.8 (ipso), 131.8 (ipso), 113.9 (*m*-Anis), 55.8 (OMe); **UV-Vis (nm, logε):** 852 (4.0), 766 (3.2), 664 (4.0), 502 (4.8); **HRMS (ESI) *m/z*** = 1101.0726, calc. for C<sub>49</sub>H<sub>36</sub>Cl<sub>2</sub>N<sub>2</sub>O<sub>5</sub>Rh<sup>195</sup>Pt, [M-Cl]<sup>+</sup>: 1101.0702. **Crystal data for 5-Cl<sub>2</sub>:** C<sub>49</sub>H<sub>36</sub>N<sub>2</sub>O<sub>5</sub>Cl<sub>2</sub>PtRh, *M* = 1137.15, monoclinic, *P*2<sub>1</sub>/*c*, *a* = 10.3888(6) Å, *b* = 14.6580(7) Å, *c* = 13.6990(8) Å, β = 99.338(6)°, *V* = 2058.4(2) Å<sup>3</sup>, *Z* = 2, *D<sub>c</sub>* = 1.835 Mg m<sup>-3</sup>, *T* = 100(2) K, *R* = 0.0977, *wR* = 0.2593 (3326 reflections with *I* > 2σ(*I*)) for 281 variables, CCDC 2241159.

**Reduction of 5-Cl<sub>2</sub> to 5:** 10 mg of **5-Cl<sub>2</sub>** was dissolved in CH<sub>2</sub>Cl<sub>2</sub> (1 ml) after the addition of 50 mg Zn/Hg in an inert atmosphere. The mixture was stirred for 24 hours. The resulting product, **5**, was filtered through SiO<sub>2</sub> (8.9 mg, 95%).

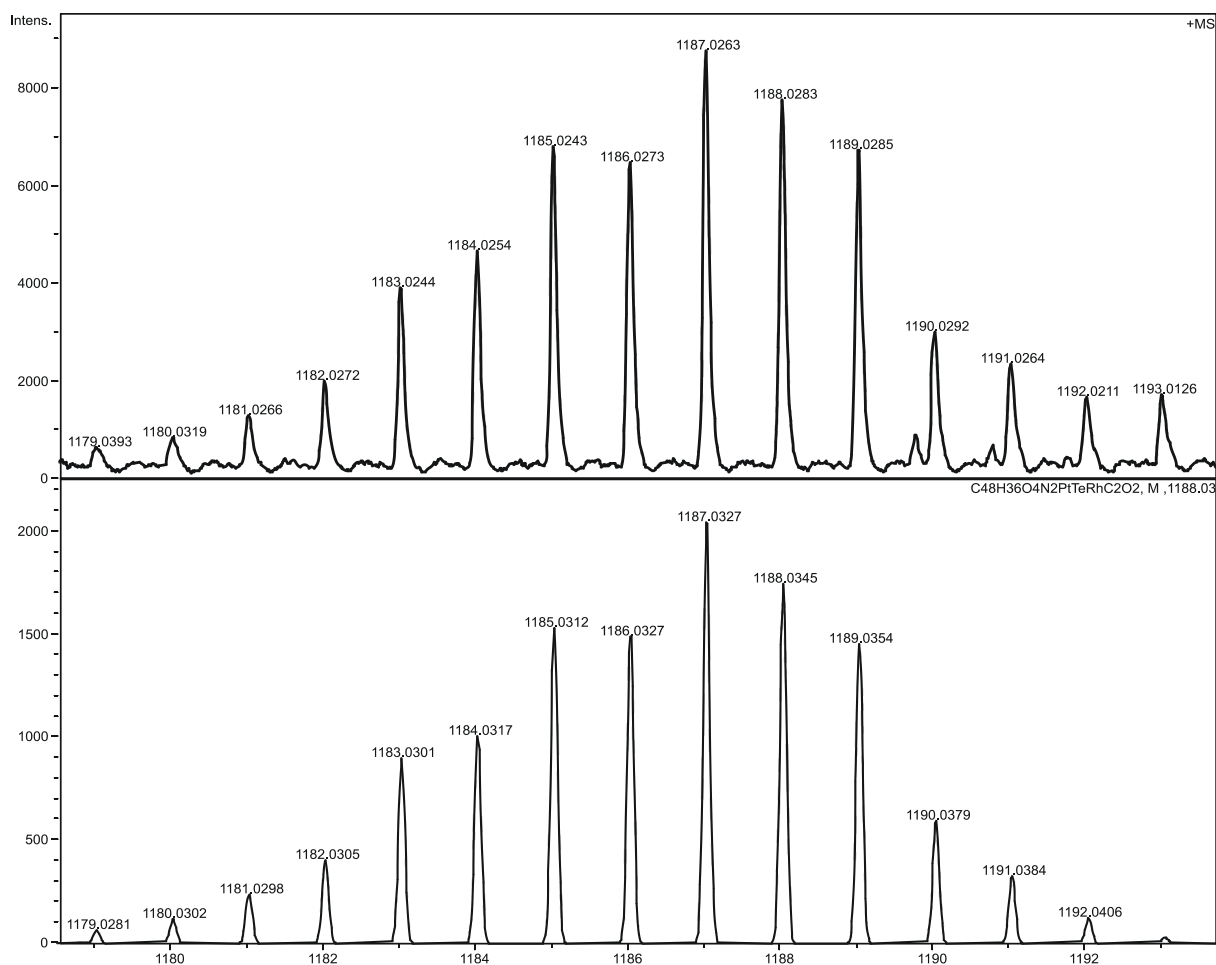

**Figure S1.** HRMS ESI (+MS) spectra of **4-Rh(CO)<sub>2</sub>Cl**: measured (top) and simulated (bottom) calc. for C<sub>48</sub>H<sub>36</sub>O<sub>4</sub><sup>130</sup>Te<sup>195</sup>PtRh(CO)<sub>2</sub>, [M-Cl]<sup>+</sup>.

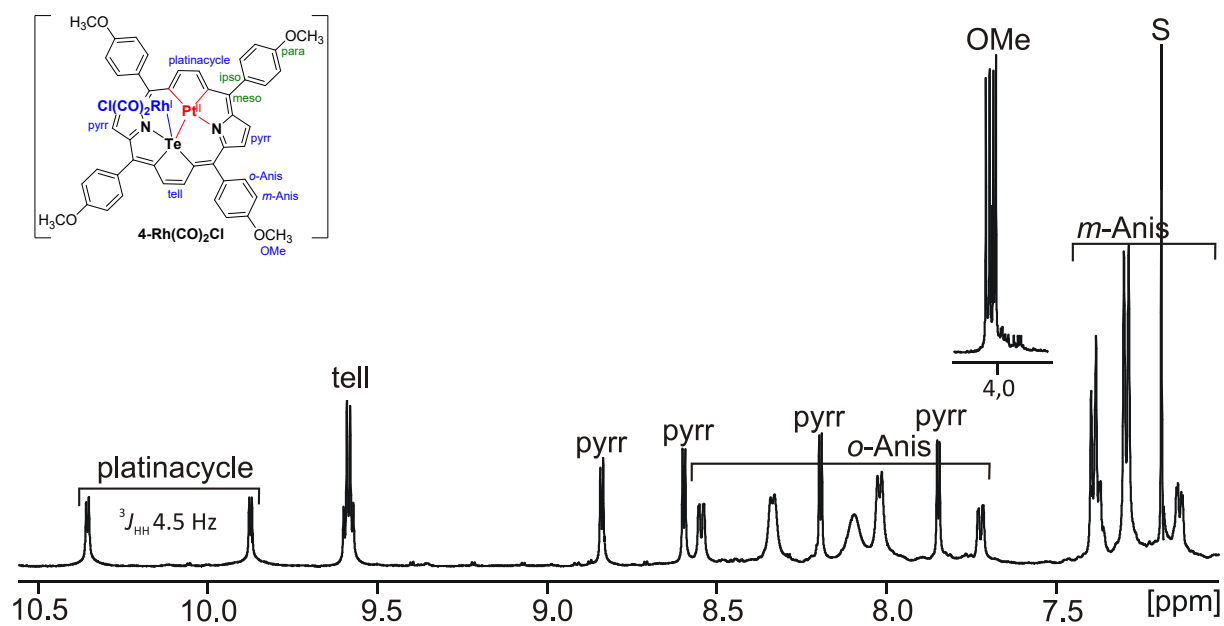

**Figure S2.** <sup>1</sup>H NMR spectrum of **4-Rh(CO)<sub>2</sub>Cl**; 600 MHz, CDCl<sub>3</sub>, 280 K.

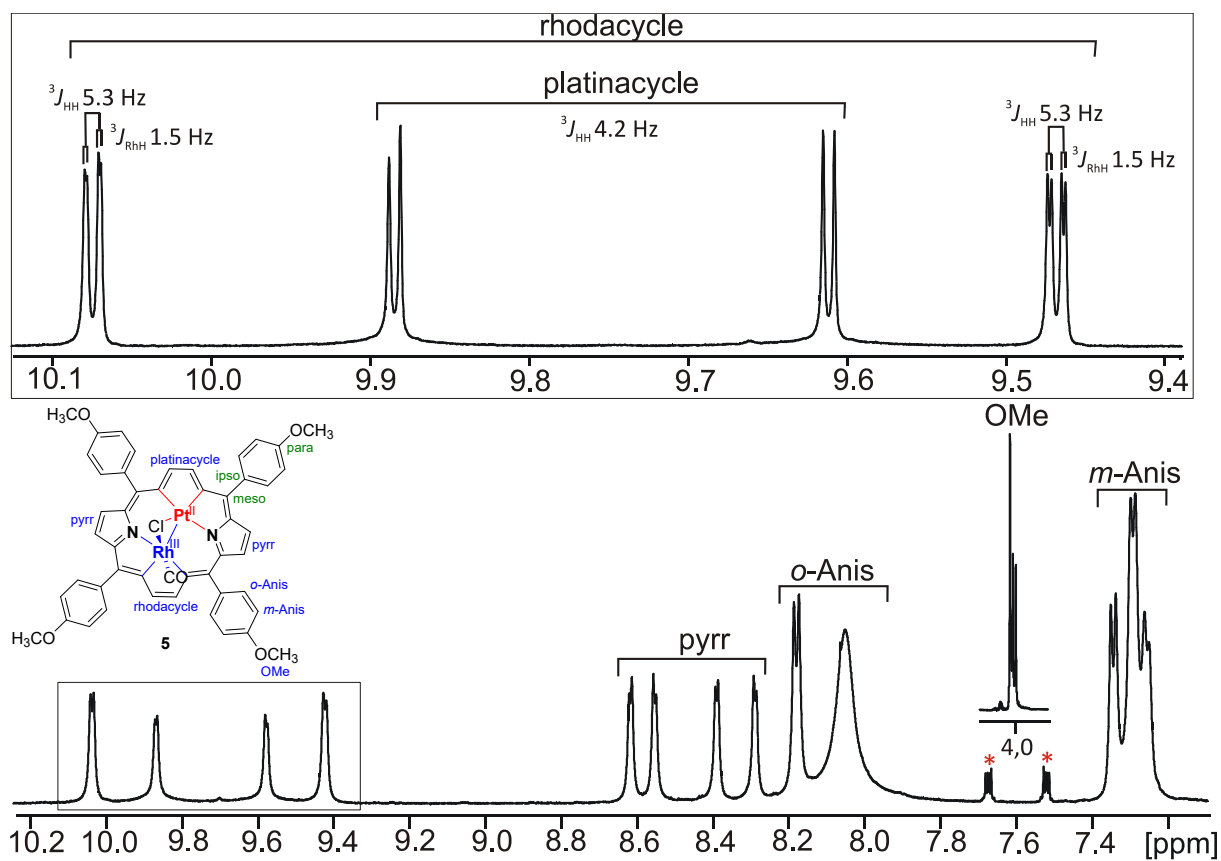

**Figure S3.**  $^1\text{H}$  NMR spectrum of **5**; 600 MHz,  $\text{CD}_2\text{Cl}_2$ , 280 K; inset: 240 K (\* = impurities).

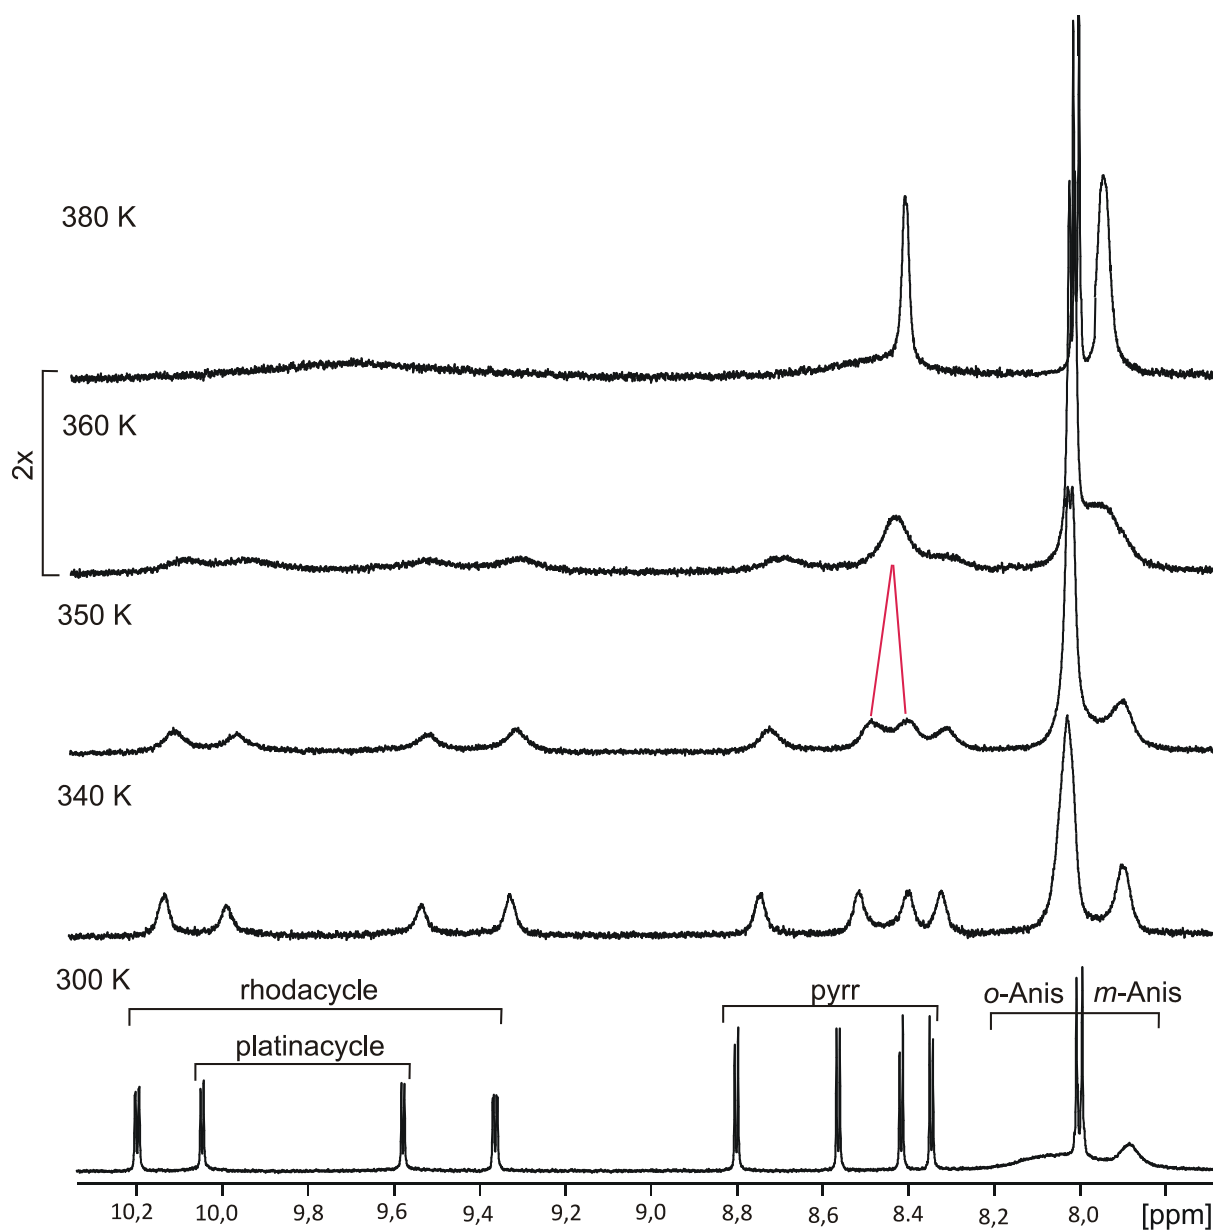

**Figure S4.** Variable temperature <sup>1</sup>H NMR spectra of **5**; 600 MHz, C<sub>7</sub>D<sub>8</sub>, 300–380 K.



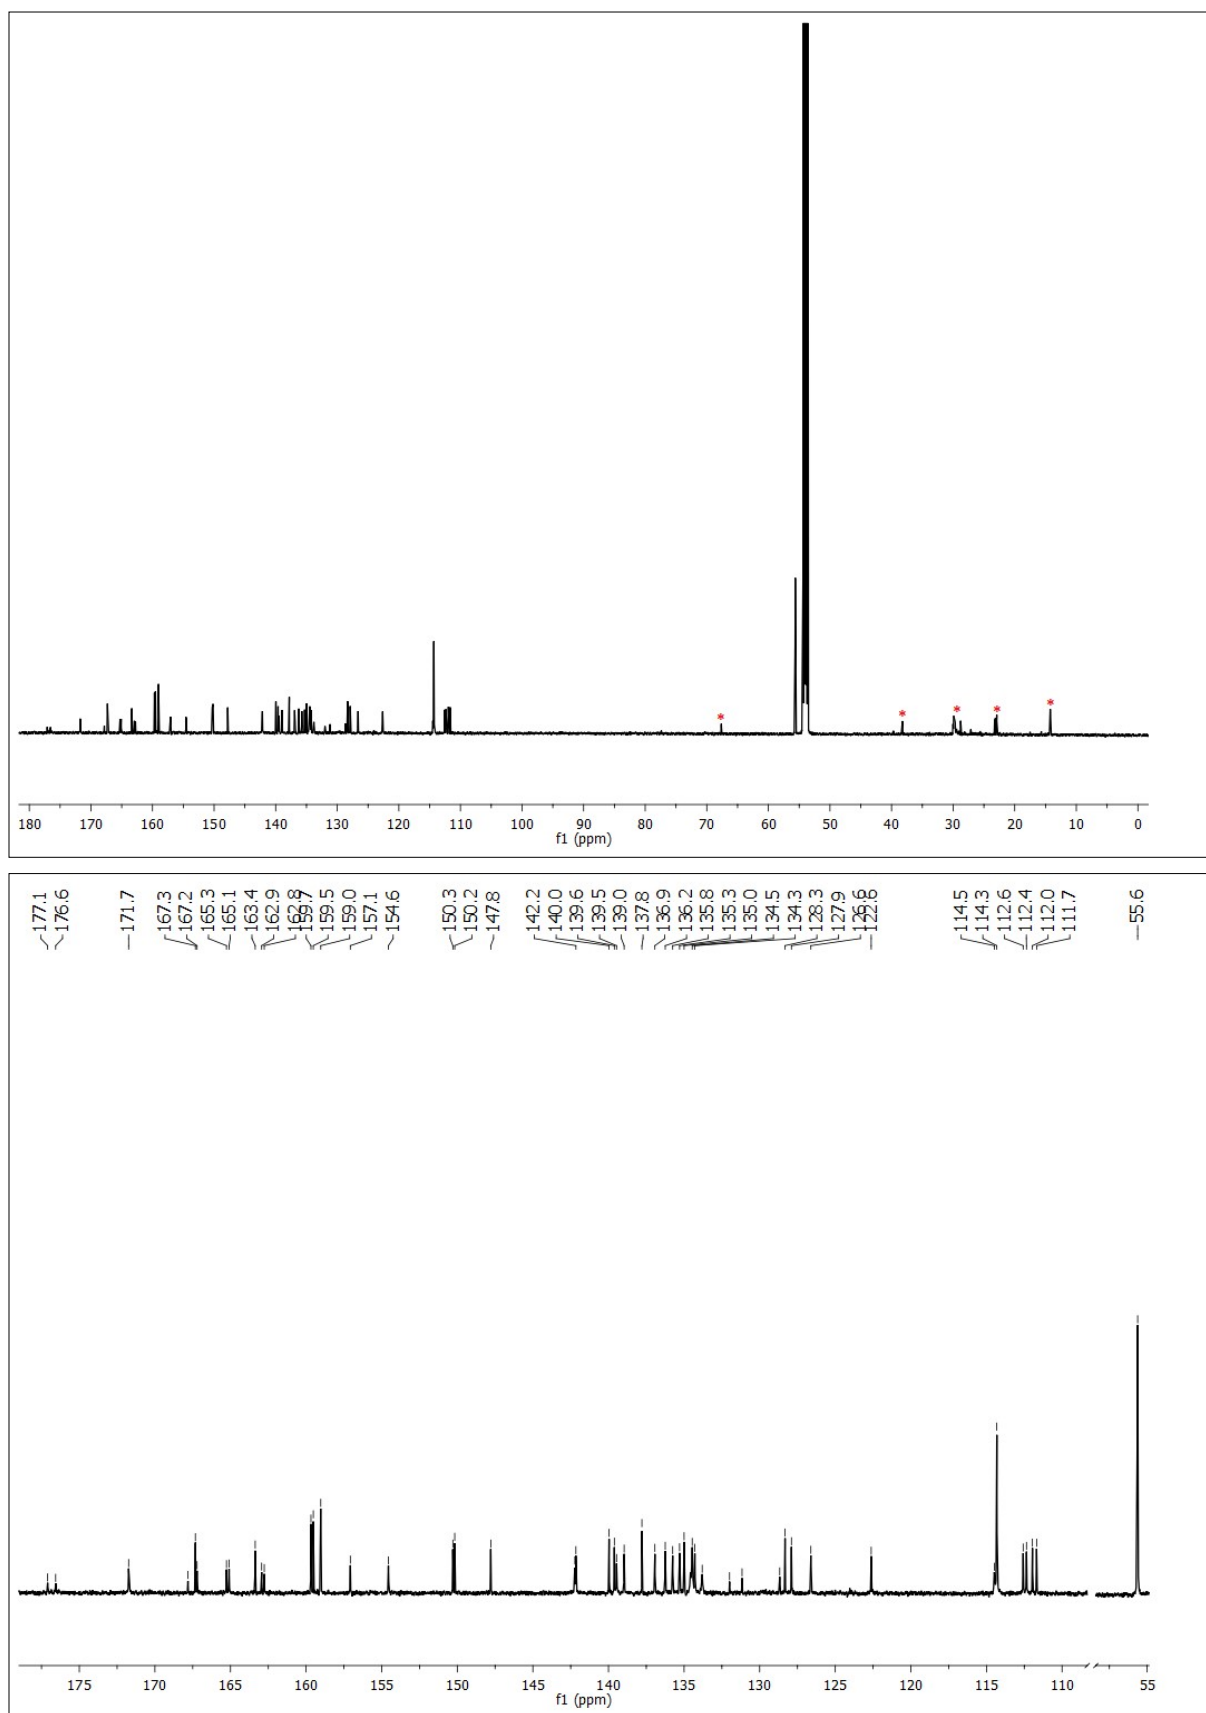

**Figure S5.**  $^{13}\text{C}$  NMR spectrum of **5**; 150 MHz,  $\text{CD}_2\text{Cl}_2$ , 220 K (top: the whole spectral range, bottom: the most informative region; \* = impurities).

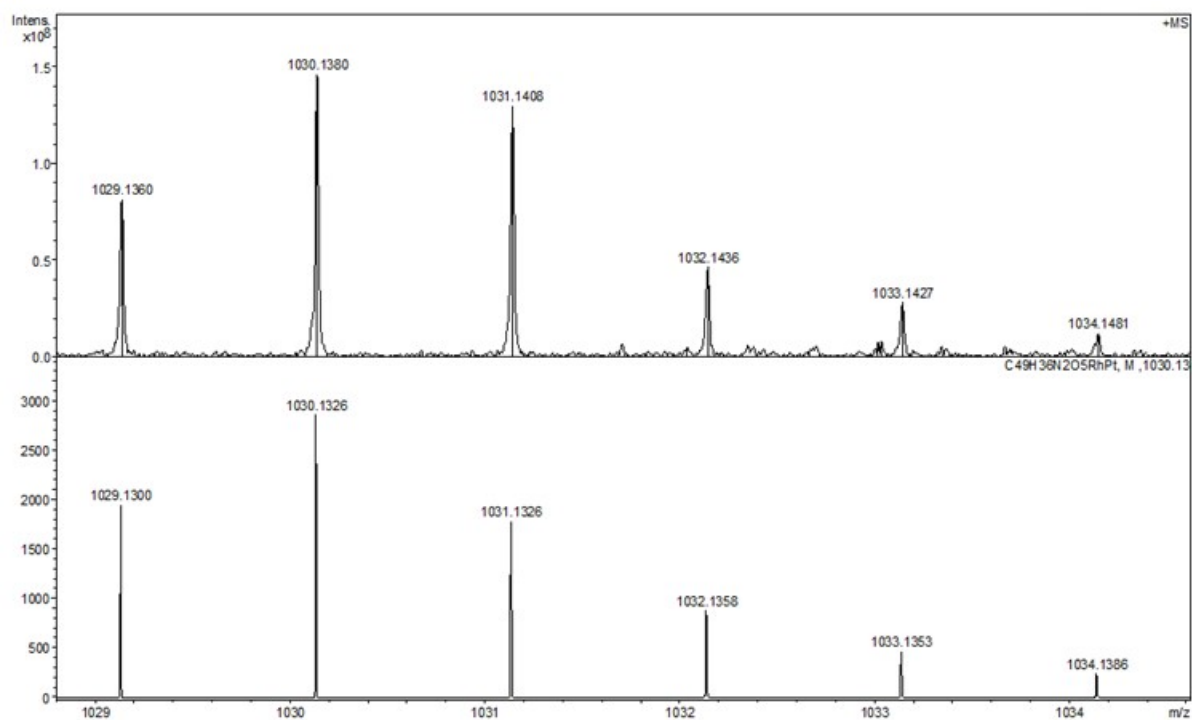

**Figure S6.** HRMS ESI (+MS) spectra of **5**: measured (top) and simulated (bottom) calc. for  $C_{49}H_{36}N_2O_5RhPt$ ,  $[M-Cl]^+$ .

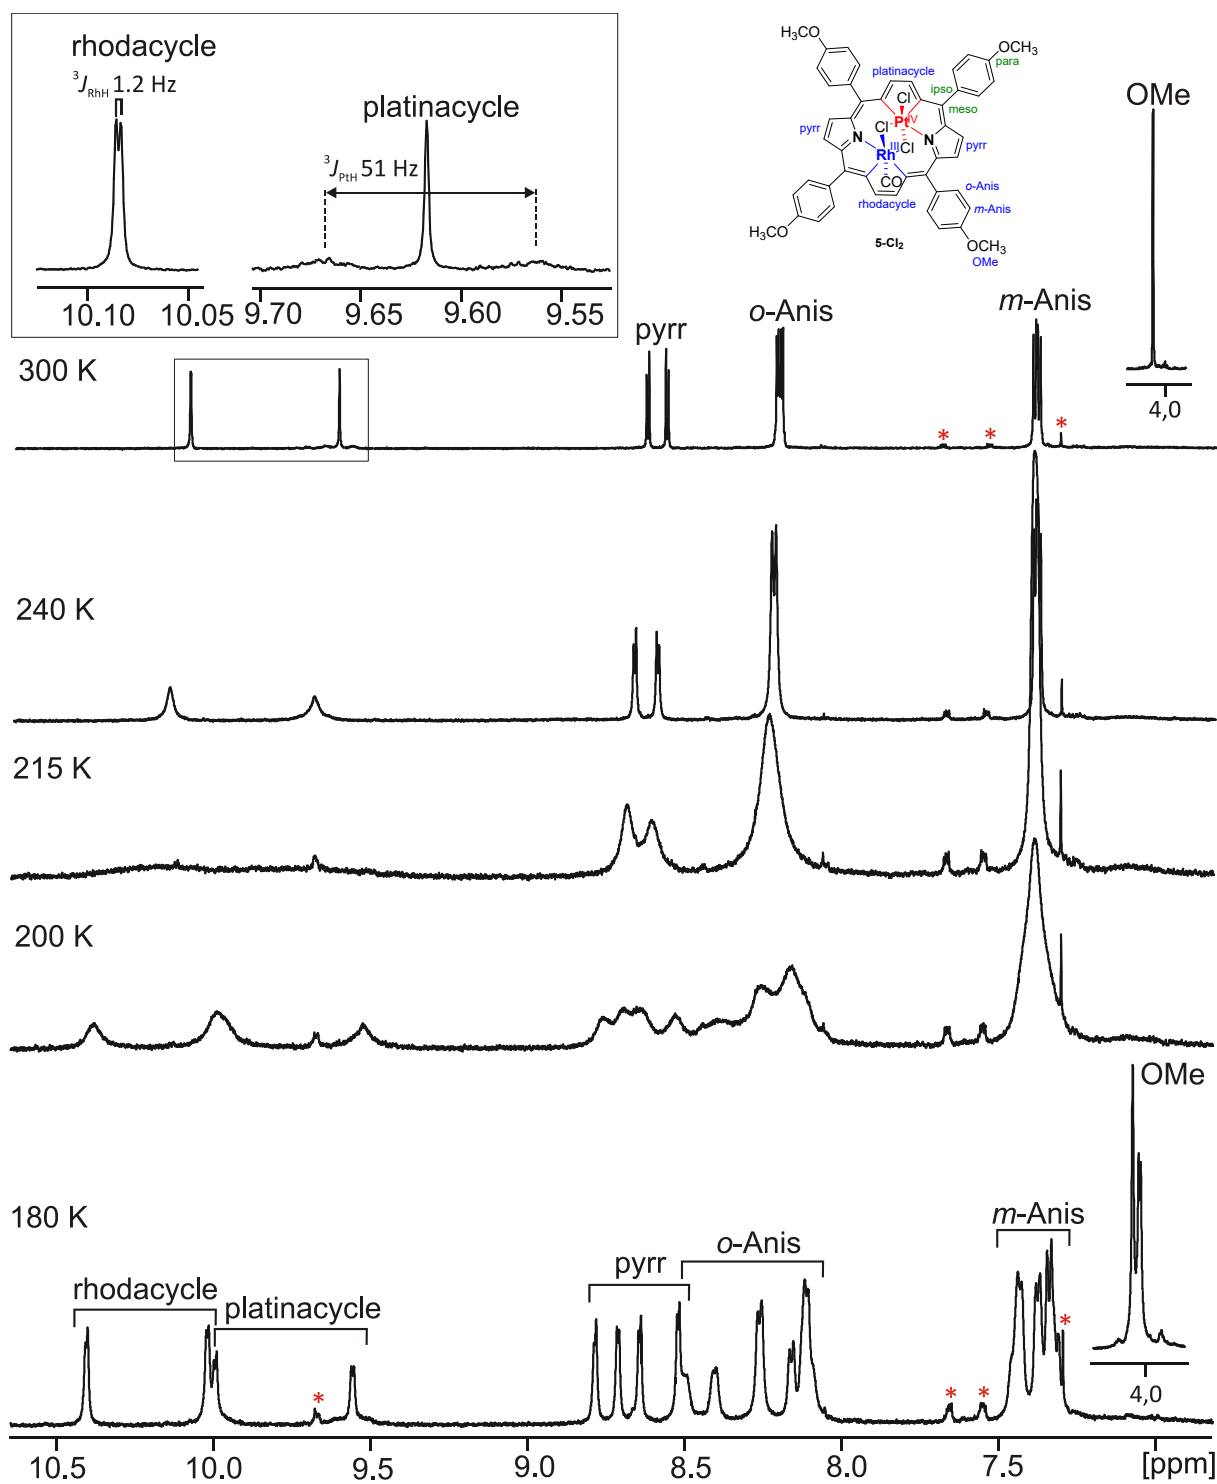

**Figure S7.** Variable temperature  $^1\text{H}$  NMR spectra of **5-Cl<sub>2</sub>**; 600 MHz,  $\text{CD}_2\text{Cl}_2$ , 180–300 K (\* = impurities).

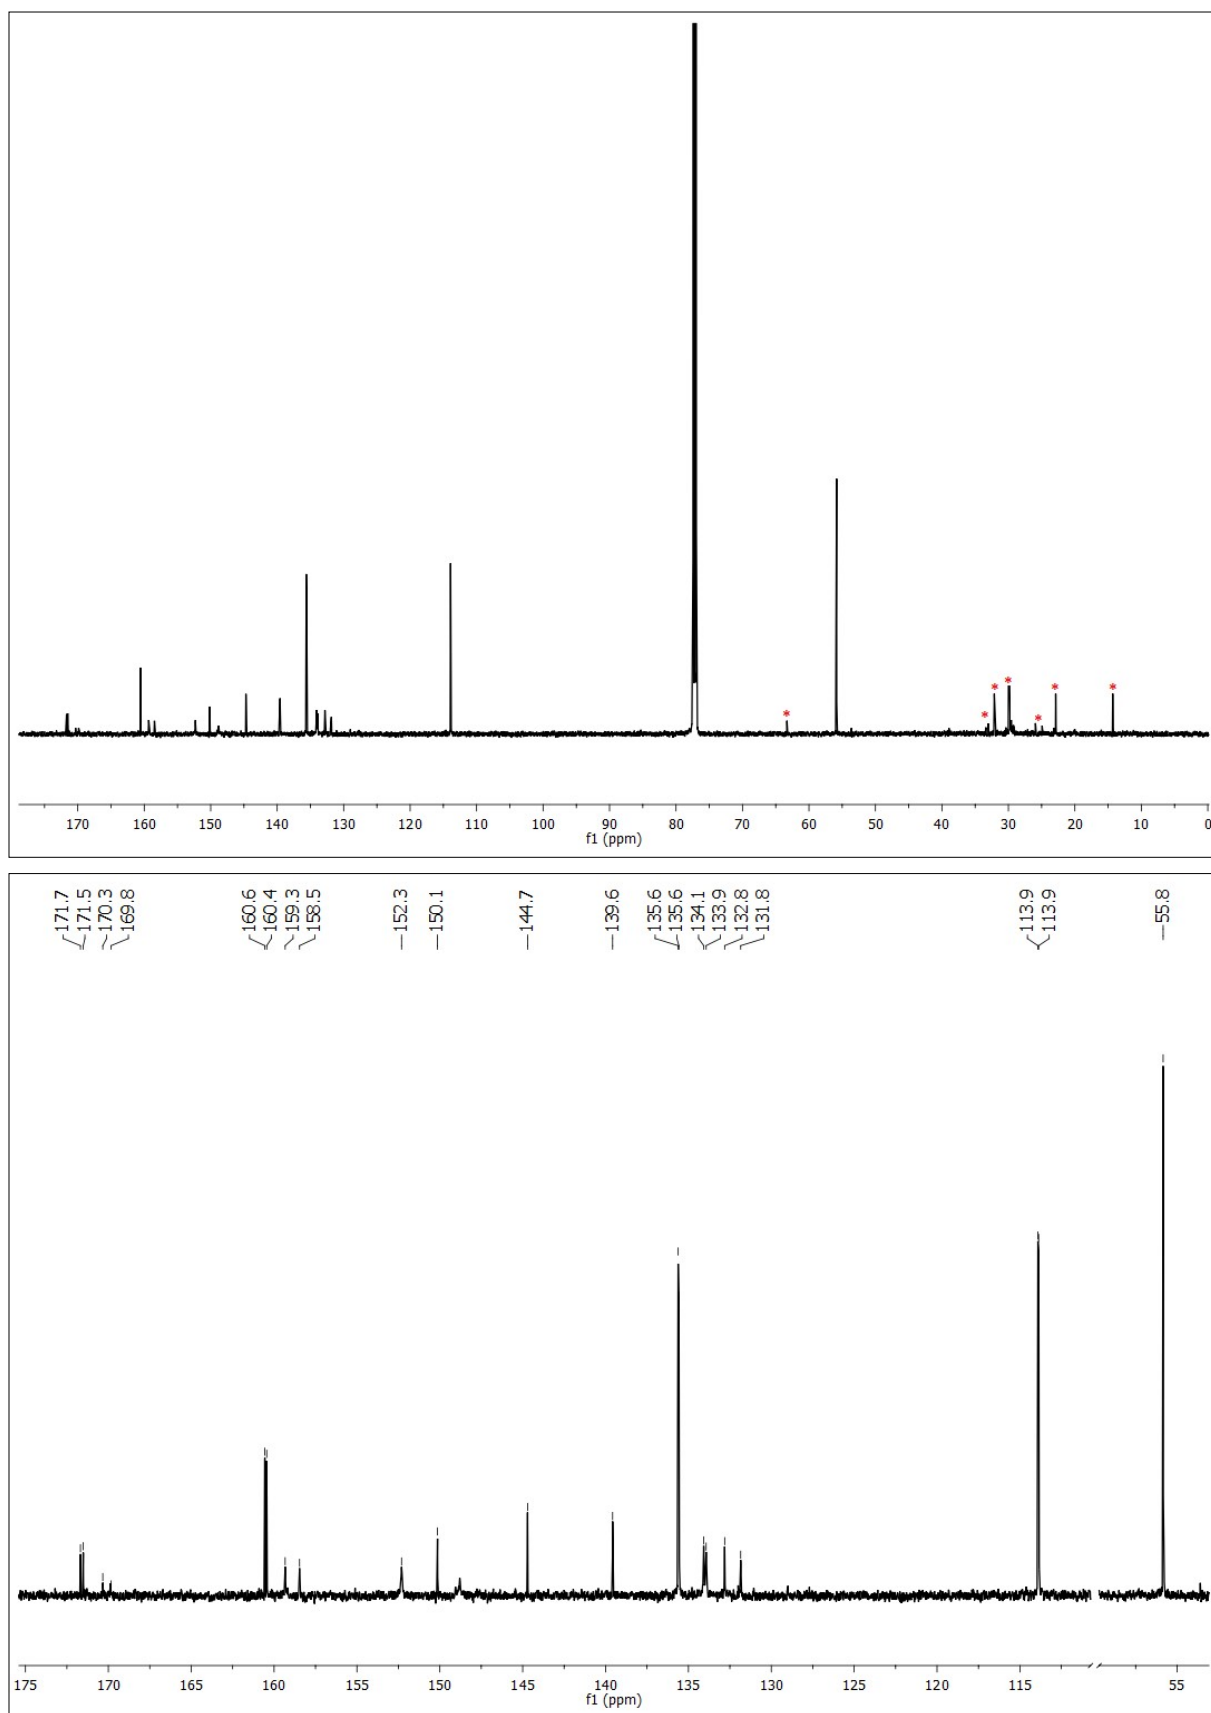

**Figure S8.**  $^{13}\text{C}$  NMR spectrum of  $5\text{-Cl}_2$ ; 150 MHz,  $\text{CDCl}_3$ , 300 K (top: the whole spectral range, bottom: the most informative region; \* = impurities).

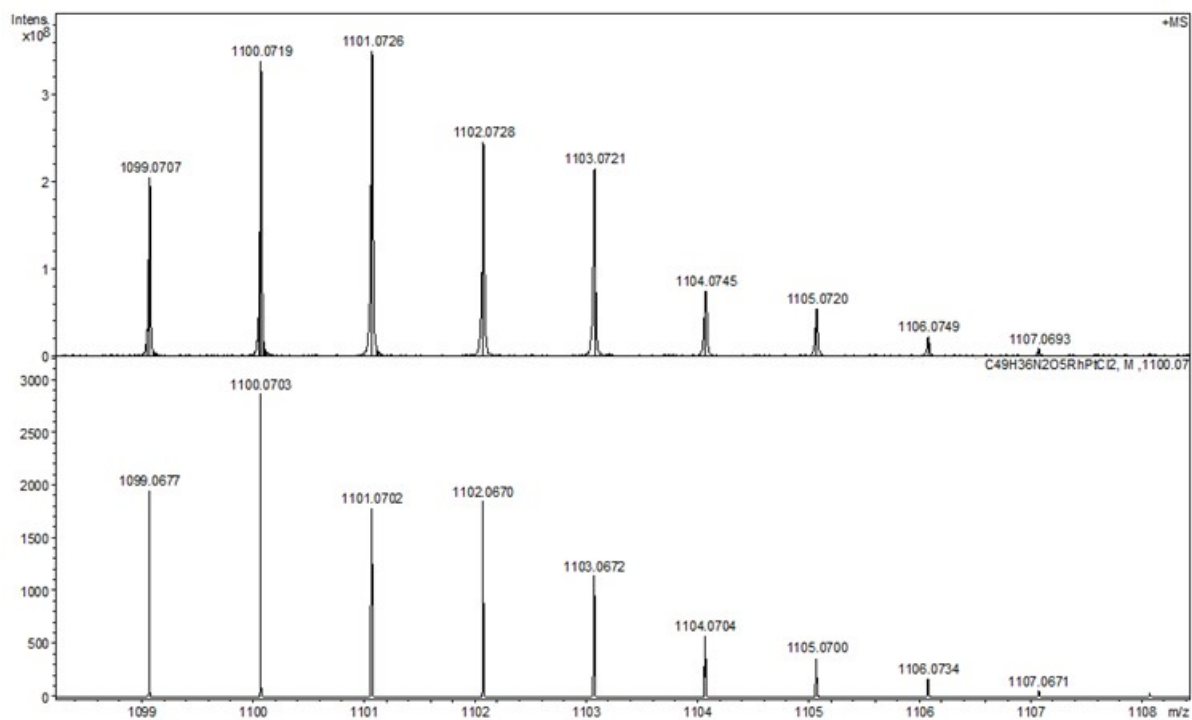

**Figure S9.** HRMS ESI (+MS) spectra of **5-Cl<sub>2</sub>**: measured (top) and simulated (bottom) calc. for  $C_{49}H_{36}Cl_2N_2O_5RhPt$ ,  $[M-Cl]^+$ .

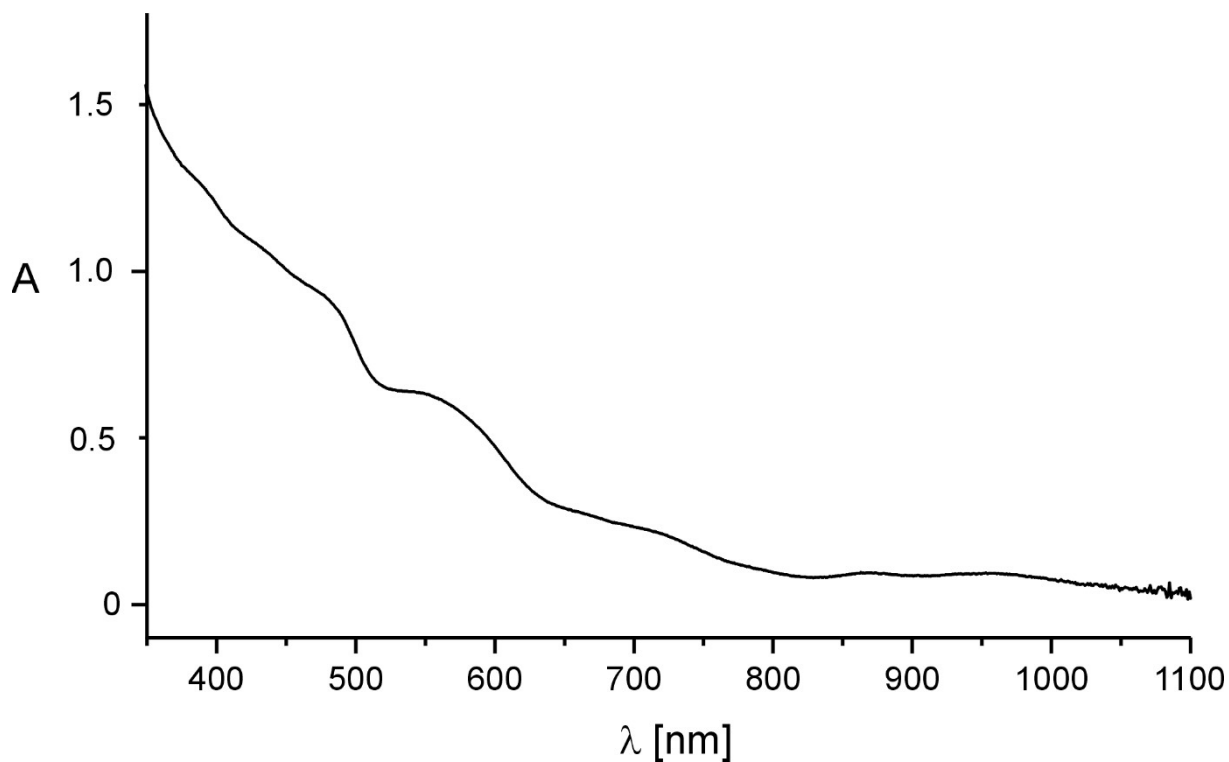

**Figure S10.** Absorption spectrum ( $CH_2Cl_2$ ) of **4-Rh(CO)<sub>2</sub>Cl**.

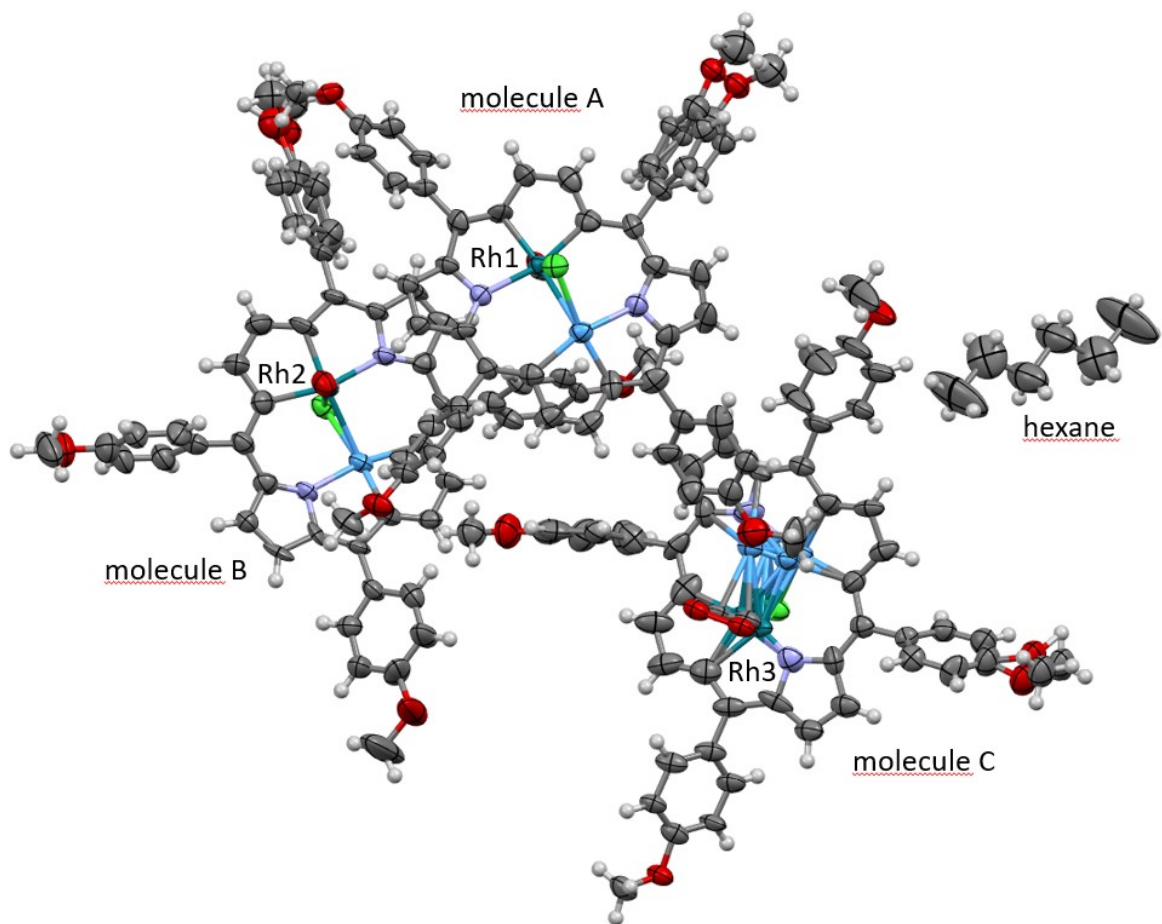

**Figure S11.** X-ray structure of **5**. Only molecules A and B were employed for the discussion. Displacement ellipsoids represent 50% probability.

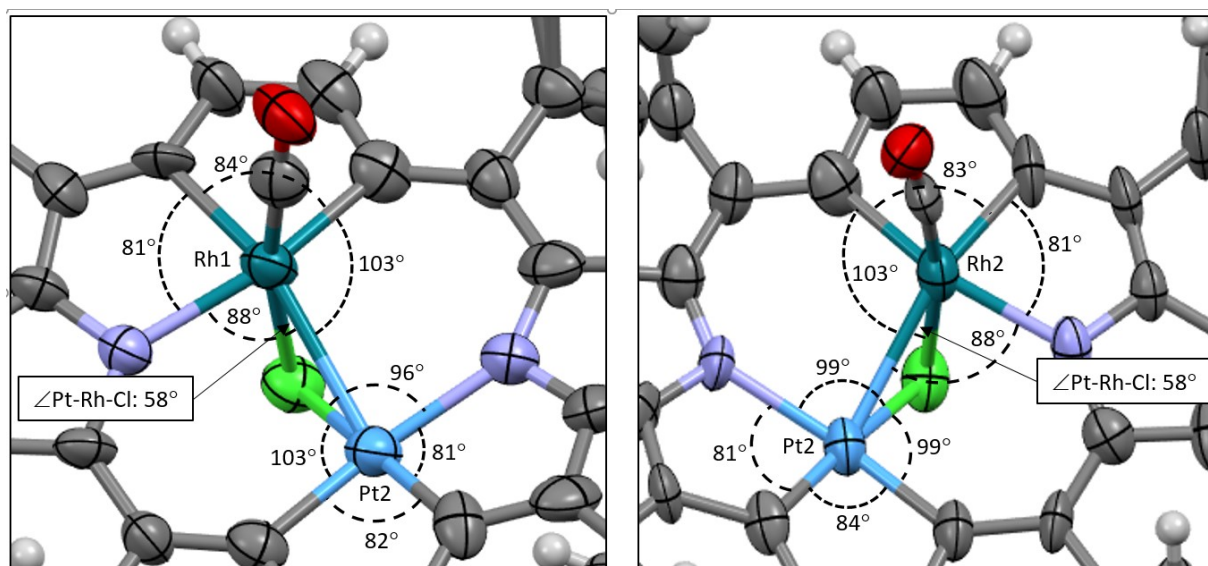

**Figure S12.** Angles around the central part of **5**; molecules A (left) and B (right).

### 3. Computational methodology

#### 3.1. Calculations focused on metal–metal bond analysis

The initial structures for single molecules of **1**, **5** and **5-Cl<sub>2</sub>** as well as for the conformational change transition states of **5** and **5-Cl<sub>2</sub>** were derived from the crystal data and DFT optimization with the B3PW91 functional and mixed basis set (SDD with associated effective core potential for the metal atoms, 6-31G(d,p) otherwise). These structures were optimized at the  $\omega$ B97-D3/def2-TZVP<sup>5,6</sup> level (the triple zeta Ahlrichs basis set also contains the effective core potentials for Pt and Rh) with default convergence settings, and the nature of the located stationary points was verified via harmonic vibrational analysis, which yielded additionally the Gibbs free energy values. The RIJCOSX approximation<sup>7</sup> with auxiliary basis set corresponding to the def2-TZVP basis were used to speed up the DFT calculations. The DFT calculations were carried out with the ORCA 5.0.3 program.<sup>8</sup> Then, the electronic structure output files from ORCA were converted to the MOLDEN format using the orca2mkl utility and further converted to the WFX standard file with the Molden2AIM package.<sup>9</sup> The MOLDEN and WFX files were then used for three types of analysis: Natural Bond Orbitals (NBO) description of bonding (carried out with the NBO 6.0 standalone program),<sup>10</sup> Quantum Theory of Atoms in Molecules (QTAIM) topological study of electron density (performed with the AIMStudio 16.10.31)<sup>11</sup> and Electron Localization Function (ELF) investigation (via MultiWFN 3.8 code).<sup>12</sup> Visualization of the QTAIM results was carried out within the AIMStudio program, while the ELF graph was prepared in GNUPlot 5.4 using data from MultiWFN.

#### 3.2. Calculations of possible structures of 4-Rh(CO)<sub>2</sub>Cl

Density functional theory (DFT) calculations were performed using the Gaussian 16 program.<sup>13</sup> DFT geometry optimizations were carried out in the unconstrained *C*<sub>1</sub> symmetry in vacuo, using molecular mechanics models as starting geometries. The existence of a local energy minimum was verified by a normal mode frequency calculation. DFT calculations were performed using the hybrid functional b3pw91 and a combined basis set consisting of SDD pseudopotential for Rh, Te, and Pt atoms and 6-31G(d,p) for the remaining atoms. Such a functional and basis combination has properly modelled the macrocyclic geometries in our previous work with 21,23-dirhodaporphyrin.<sup>14</sup> All relative energies include the zero-point correction.

### 4. Computational results

#### 4.1. Energetic and structural considerations

The energetic parameters of the optimized structures, contained within Table S1, indicate that the conformational dynamics in **5** is much slower as compared to **5-Cl<sub>2</sub>**. The barrier estimates, given by the relative energies of the conformational transition states, are in relatively good agreement with the experiment (consistently 3 kcal/mol higher barriers than from the NMR experiment), which is carried out in a solvent, while the gas phase models are used in

calculations. The role of thermal corrections (zero point vibrations, rotational terms) is very small.

The metal–metal separations can be significant for explanation of the barrier heights. Relatively short Pt–Rh distance (2.715 Å) in **5**, comparable to the Pd–Pd distance of 2.67 Å found in a *cis*-bimetallic complex of dinaphthoporphycene,<sup>15</sup> suggests some degree of metal–metal bonding, which will be investigated in the following paragraphs. This is not the case for **1** and **5-Cl<sub>2</sub>**, but interestingly the conformational transition state of **5-Cl<sub>2</sub>** has the Pt–Rh distance significantly shortened (from 2.995 to 2.766 Å), already comparable to **5**. Thus, the [**5-Cl<sub>2</sub>**]<sup>‡</sup> structure can be potentially stabilized by the metal–metal interaction, lowering the barrier. Conversely, the metal–metal distance in [**5**]<sup>‡</sup> (2.658 Å) might be sterically forced, and already in the repulsive regime, destabilizing this structure and heightening the barrier. It is important to note that for **1** the barrier is small enough to warrant fast NMR exchange; the computational estimate is also decidedly smaller than for the Pt–Rh compounds. The barrier height is inversely correlated with the shortening of the metal–metal distance between the minimum and the transition state. This shortening is most pronounced for **1** (from 2.962 to 2.708 Å – by 0.254 Å), quite significant for **5-Cl<sub>2</sub>** (by 0.229 Å) and least visible for **5** (by 0.057 Å); the metal–metal distance in [**1**]<sup>‡</sup> is even smaller than in the [**5**]<sup>‡</sup>, but the barrier is very low – this fact suggests that the reason for barrier lowering is the presence of metal–metal bonding in the transition state. The structure **5** contains such bonding already before reaching the transition state (see the discussion below), therefore it does not gain any stability in the transition state.

**Table S1.** Energies of the optimized structures of **1**, **5** and **5-Cl<sub>2</sub>** together with the metal–metal distances. Results of ωB97-D3/def2-TZVP calculations. Gibbs free energies are electronic energies corrected for harmonic vibrational and rotational terms at 298.15 K and 1 atm.

|                                        | <b>1</b> (Rh–Rh) | [ <b>1</b> ] <sup>‡</sup> (Rh–Rh)                                | <b>5</b> (Pt–Rh) | [ <b>5</b> ] <sup>‡</sup> (Pt–Rh) | <b>5-Cl<sub>2</sub></b> (Pt–Rh) | [ <b>5-Cl<sub>2</sub></b> ] <sup>‡</sup> (Pt–Rh) |
|----------------------------------------|------------------|------------------------------------------------------------------|------------------|-----------------------------------|---------------------------------|--------------------------------------------------|
| d(M <sub>1</sub> –M <sub>2</sub> ) [Å] | 2.962            | 2.708                                                            | 2.715            | 2.658                             | 2.995                           | 2.766                                            |
| d(M <sub>2</sub> –M <sub>2</sub> ) [Å] | 2.867(1)         |                                                                  | 2.6972(12)       |                                   | 2.911(6)                        |                                                  |
| (X-ray)                                |                  |                                                                  | 2.7172(13)       |                                   |                                 |                                                  |
| Total Energy [Ha]                      | –3629.69232582   | –3629.67869195                                                   | –3064.90711962   | –3064.87401216                    | –3985.35782358                  | –3985.33667804                                   |
| Gibbs free energy [Ha]                 | –3629.02980878   | –3629.01744325                                                   | –3064.25346656   | –3064.21935939                    | –3984.70264711                  | –3984.68136543                                   |
| Relative energy [kcal/mol]             | 0                | 8.5                                                              | 0                | 20.8                              | 0                               | 13.3                                             |
| Relative Gibbs free energy [kcal/mol]  | 0                | 7.7                                                              | 0                | 21.4                              | 0                               | 13.4                                             |
| Exp. (NMR) barrier [kcal/mol]          |                  | small (fast NMR exchange in the available temp. range 300-175 K) |                  | 17.4(5)                           |                                 | 9.4(2)                                           |



## 4.2. Metal–metal bonding – QTAIM and ELF description

The presence of metal–metal interaction in a single molecule cannot be easily studied using supramolecular approach, *i.e.* by decomposing the structure into two separate parts and calculating the interaction energy between them. We resort to other methods of electronic structure analysis. In particular, Quantum Theory of Atoms in Molecules (QTAIM)<sup>16</sup> was found useful in understanding interatomic bonding schemes including metal–metal bonds.<sup>17</sup> The topology of electron density close to the metal centers is presented in the Figure S13, while the parameters of the most relevant Bond Critical Points (BCPs) are given in Table S2. Table S3 provides data on several BCPs in the structure of **5**, so that the metal–metal BCPs can be put in the perspective of other bonds.

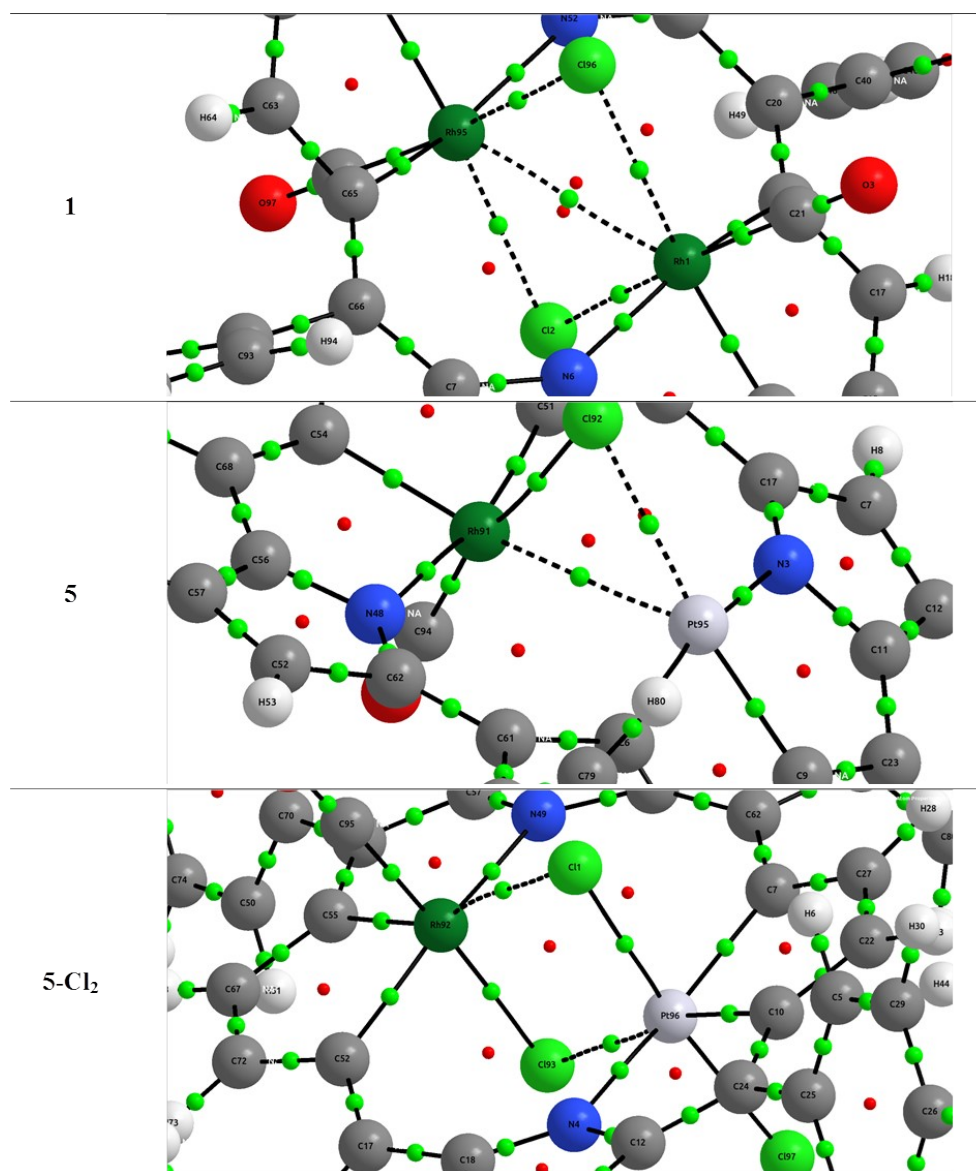

**Figure S13.** Topology of electron density in the vicinity of metal centers of **1**, **5** and **5-Cl<sub>2</sub>** – results of QTAIM analysis. Atom color coding: dark green – Rh, silver – Pt, grey – C, white – H, blue – N, red – O, green – Cl. Critical point color coding: green – bond critical points (BCP), red – ring critical points (RCP). The atoms are connected with QTAIM bond paths. Low values of electron density at a particular BCP are signaled by dashed bond paths.

**Table S2.** QTAIM parameters of the metal–metal bond critical points.

|                                        | <b>1</b> | <b>5</b> | <b>5-Cl<sub>2</sub></b> |
|----------------------------------------|----------|----------|-------------------------|
| d(M <sub>1</sub> -M <sub>2</sub> ) [Å] | 2.962    | 2.715    | 2.995                   |
| ρ [a.u.]                               | 0.0264   | 0.0463   | ---                     |
| Laplacian of ρ [a.u.]                  | +0.0613  | +0.1251  | ---                     |
| Ellipticity                            | 1.665    | 0.190    | ---                     |
| d(BCP-RCP) [Å]                         | 0.316    | 0.473    | ---                     |

**Table S3.** QTAIM parameters of selected BCPs in **5**.

|                       | <b>Pt–Rh</b> | <b>Pt–N</b>  | <b>Rh–N</b>   |
|-----------------------|--------------|--------------|---------------|
| ρ [a.u.]              | 0.0463       | 0.1077       | 0.0866        |
| Laplacian of ρ [a.u.] | +0.1251      | +0.3754      | +0.3471       |
| Ellipticity           | 0.190        | 0.061        | 0.093         |
|                       | <b>Pt–Cl</b> | <b>Rh–Cl</b> | <b>C6–C26</b> |
| ρ [a.u.]              | 0.0623       | 0.0735       | 0.3257        |
| Laplacian of ρ [a.u.] | +0.1916      | +0.2320      | −0.9567       |
| Ellipticity           | 0.103        | 0.108        | 0.212         |

The data presented above indicate that the structure of **5-Cl<sub>2</sub>** does not exhibit a Pt–Rh BCP, while the structure of **1**, with very similar metal–metal distance, does have a Rh–Rh BCP and associated interatomic path. The structure of **5** also contains a metal–metal BCP. The QTAIM suggests, at the first glance, that metal–metal bonding might be present in **1** and **5**. Comparison of the BCP properties (Table S2) shows that the electron density ρ and its Laplacian for the BCP of **1** are only two times smaller than in **5**, despite large difference in the metal–metal distance. However, there is large disparity between the ellipticity values. Ellipticity is a parameter associated with distortion of the electron density in the plane perpendicular to the bond path at the BCP. Ellipticity values are large for double bonds (C=C, C=O etc., attaining 0.23 for benzene and 0.45 for ethene),<sup>16</sup> which is obviously not the case here, and also in situations of very low electron density at the BCP, not really indicative of bonding, but rather due to sterically forced atom–atom proximity. We consider **1** to be such a case. Small structural changes would then lead to coalescence of the bond and ring critical points (see the green and red dots on Figure S13) into a new ring critical point, leading to the situation found in **5-Cl<sub>2</sub>**. The BCP–RCP distance in **1** is shorter than in **5**, supporting this reasoning.

The Pt–Rh BCP in **5** has electron density of only 0.0463 a.u., which is an order of magnitude smaller than the ρ for covalent bonds (see Table S3), but comparable to the values found in hydrogen bonds and coordination bonds – the Table S3 shows that both ρ and its Laplacian are ca. two times larger for the Pt–N, Rh–N, Pt–Cl, Rh–Cl contacts. The covalent C–C bond is markedly different from the other contacts, also due to different signs of the Laplacian of ρ. These data suggest the existence of weak, but not accidental Pt–Rh contact in **5**, but not in **1** or **5-Cl<sub>2</sub>**. Further evidence of this is given by the profile of Electron Localization Function (ELF) between the metal atoms (Figure S14). While for **1** and **5-Cl<sub>2</sub>** the ELF between the metal

atoms drops uniformly, there is a distinct shoulder of the ELF for **5** suggesting a change of bonding pattern. No new nodal structure (new minima and maxima) is formed, therefore significant covalent interaction should be excluded on the basis of the ELF analysis, and weaker metal–metal contact should be considered.

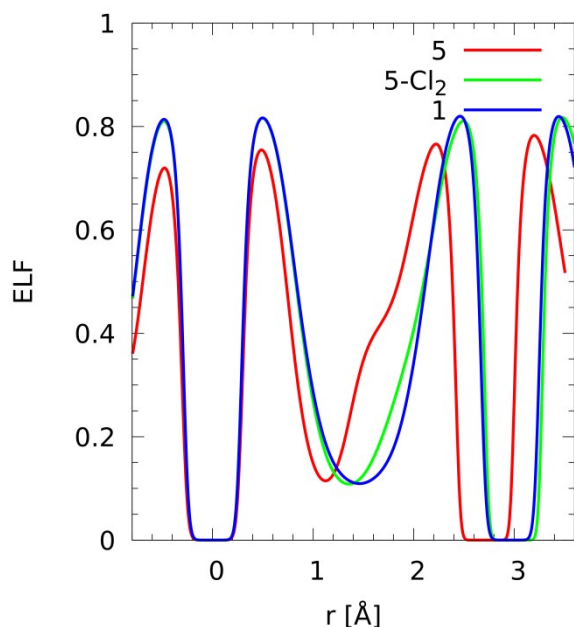

**Figure S14.** Electron Localization Function (ELF) along the metal–metal line in **1**, **5** and **5-Cl<sub>2</sub>** – the Rh atom is at coordinate 0 Å, and the second metal atom (Pt/Rh) is at the minimum of the well at 2.7–3.0 Å.

### 4.3. Natural Bond Orbital (NBO) parameters for the metal–metal bonding

The discussion above is based on the topological analysis of electron density and related functions (ELF). It is also necessary to consider the wavefunction-based arguments. In the following text, we will use the terms ‘wavefunction’ and ‘orbitals’ keeping in mind that these are in fact Kohn-Sham determinant and Kohn-Sham one-electron wavefunctions respectively.

The Natural Bond Orbitals methodology transforms the LCAO MO orbitals into a series of well-defined orbital types maximizing their localization or occupation number.<sup>18</sup> The resulting orbitals represent the dominant Lewis structure, and their properties are less basis-set dependent than raw LCAO MO orbitals. The parameters listed in Table S4 allow for estimating the metal–metal bond order. The Wiberg bond index (calculated from standard orbitals, not NBO) is a measure of electron population overlap between two atoms, or an average number of electron pairs shared by both atoms. In our study, the Wiberg bond index is reported in the NBO spirit, *i.e.* calculated within the Natural Atomic Orbitals basis. Its value, while not close to 1 (ideal single bond), is markedly higher for **5** than for the other considered molecules, in agreement with the discussion above. It is also very close to the value of 0.18 found in a *cis*-bipalladium complex of dinaphthoporphycene,<sup>15</sup> suggesting similarity of the bonding schemes in the two cases. The bond index calculated from the NBO-derived natural localized molecular orbitals (NLMOs) is very similar in magnitude. Concluding, the computational methods

indicate the presence of metal–metal (Pt–Rh) interaction in **5**, which is however weaker than a formal single metal–metal bond. The NLMO/NPA bond orders are much increased in the transition states, once more suggesting important role of metal–metal interactions in determining the conformational flexibility of the studied systems.

**Table S4.** NBO parameters for the metal–metal interactions and metal atom net charges.

|                            | <b>1</b> (Rh–Rh)               | <b>5</b> (Pt–Rh)               | <b>5-Cl<sub>2</sub></b> (Pt–Rh)               |
|----------------------------|--------------------------------|--------------------------------|-----------------------------------------------|
| Wiberg Bond Index          | 0.0405                         | 0.1528                         | 0.0318                                        |
| Linear NLMO/NPA Bond Order |                                |                                |                                               |
| Bond Order                 | 0.0452                         | 0.1482                         | 0.0418                                        |
| q(Rh)                      | 0.439                          | 0.475                          | 0.433                                         |
| q(Pt / Rh)                 | 0.436                          | 0.587                          | 1.004                                         |
|                            | <b>[1]<sup>‡</sup></b> (Rh–Rh) | <b>[5]<sup>‡</sup></b> (Pt–Rh) | <b>[5-Cl<sub>2</sub>]<sup>‡</sup></b> (Pt–Rh) |
| Wiberg Bond Index          | 0.0687                         | 0.0842                         | 0.0609                                        |
| Linear NLMO/NPA Bond Order |                                |                                |                                               |
| Bond Order                 | 0.1142                         | 0.1591                         | 0.1306                                        |

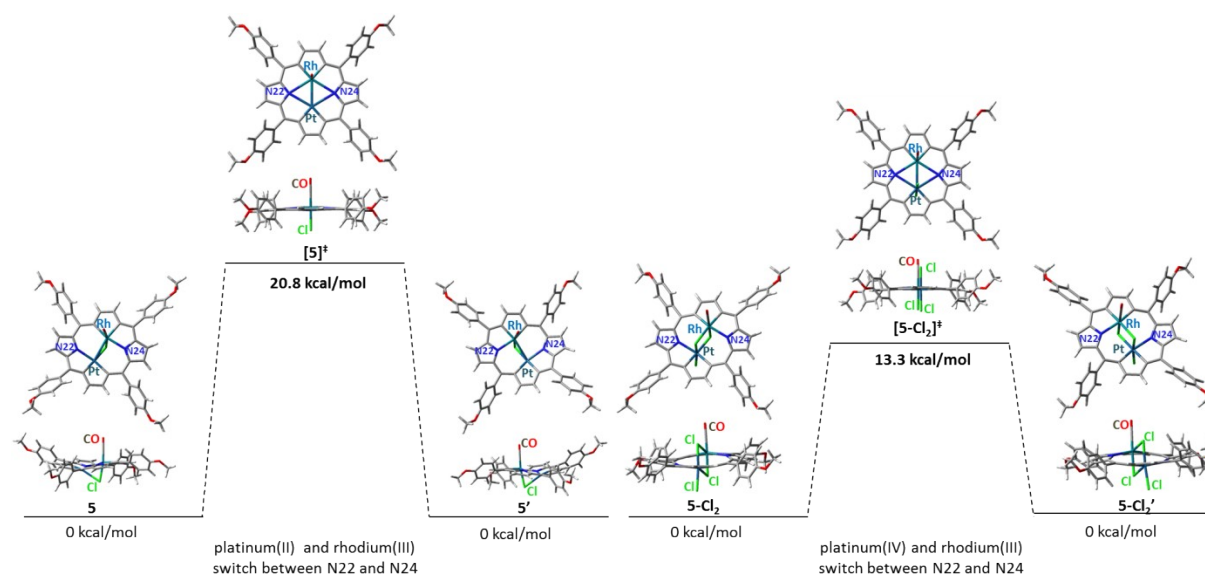

**Figure S15.** Energy diagram for conformational interconversions of **5** and **5-Cl<sub>2</sub>**.

#### 4.4. Calculations of possible structures of **4-Rh(CO)<sub>2</sub>Cl**

The structure of an intermediate product **4-Rh(CO)<sub>2</sub>Cl** is proposed on the basis of <sup>1</sup>H NMR analysis (*C*<sub>1</sub> symmetry, aromaticity), HRMS spectrometry (detection of **[4-Rh(CO)<sub>2</sub>]<sup>+</sup>** ion) and by analogy to the literature example (coordination of Rh(CO)<sub>2</sub>Cl unit to a monodentate site of N-confused porphyrin).<sup>19</sup> Two heteroatoms available for rhodium(I) binding, tellurium and nitrogen, were taken under consideration. Thus, calculations were performed for six models presented in order of increasing energy in Figure S16. In three of the hypothetical structures (No. **1**, **2** and **5**), rhodium(I) is attached to the tellurium atom, while in the remaining structures, rhodium(I) is linked to the nitrogen atom, not engaged in platinum coordination. Furthermore,

the structures differ in chloride and carbonyl ligands arrangement, and the results of the calculations show, that the cis arrangement of two CO ligands has lower energy, as expected.<sup>20</sup> Two pairs of isomers may be regarded as pairs of rotamers (No. 1 and 2; No. 3 and 4). We assume, that the most probable structure of **4-Rh(CO)<sub>2</sub>Cl** is the structure **4-Rh(CO)<sub>2</sub>Cl-1** and its rotamer **4-Rh(CO)<sub>2</sub>Cl-2**.

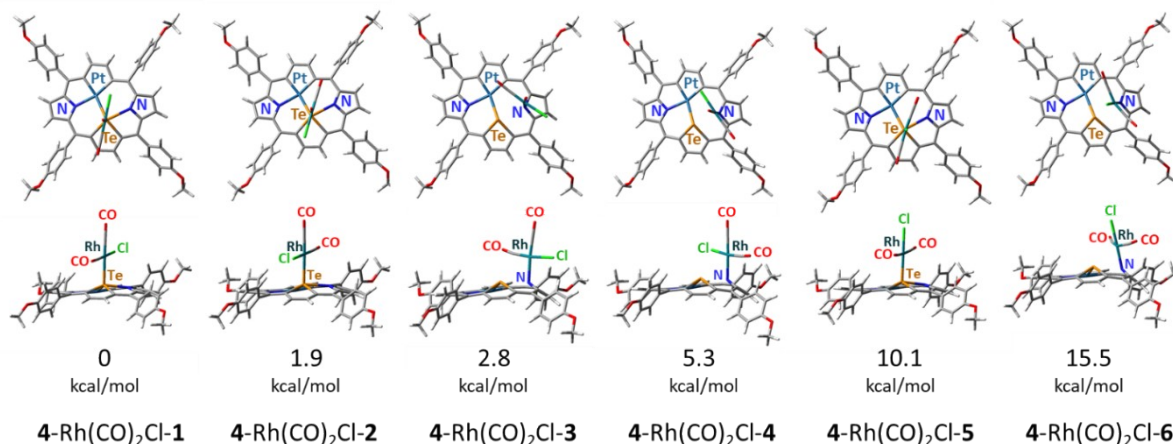

**Figure S16.** DFT-optimized structures of possible isomers of **4-Rh(CO)<sub>2</sub>Cl** and their relative energies.

**Table S5.** Cartesian coordinates of DFT ( $\omega$ B97-D3/def2-TZVP) optimized structures of **5** and **5-Cl<sub>2</sub>**.

#### Coordinates for **5**

|   |                   |                   |                   |   |                   |                    |                   |
|---|-------------------|-------------------|-------------------|---|-------------------|--------------------|-------------------|
| O | -0.98750526011586 | -8.82239473498507 | -1.06751418458965 | H | 7.16858017553686  | 0.66814834587787   | 3.04367798847033  |
| O | 9.23951075404538  | -0.55343181731108 | 1.76822878192417  | C | -0.86928143685147 | -9.42940857745374  | -2.33271942651605 |
| N | 1.84819156873484  | -1.70518913419292 | -0.53929851741664 | H | -1.07310042776550 | -10.48703980490550 | -2.18083659397114 |
| C | 5.63097663500529  | 0.09946317246409  | 1.67759364931849  | H | 0.13925227130608  | -9.31356832214555  | -2.74212341192367 |
| H | 4.85997314878572  | 0.60415997772078  | 2.24711279109396  | H | -1.59564702410960 | -9.02256607285357  | -3.04354850292100 |
| C | 1.20521457746138  | 2.29233966629310  | -0.57281866162654 | C | -0.65677905685888 | -5.59395222477872  | 0.50086047667205  |
| C | 2.40026096903527  | -3.85303198988872 | -0.08741085524915 | H | -0.74187965688881 | -5.17656250440673  | 1.49802196292321  |
| H | 2.26061431546662  | -4.91228035920883 | 0.06116080315340  | C | 7.59738820274965  | -1.22199020936464  | 0.25627853411128  |
| C | 3.09804428989005  | 0.57432670554579  | -0.10258887603182 | H | 8.38365701259176  | -1.72564983205309  | -0.29143627610552 |
| C | -0.75957105421950 | -7.48945378429028 | -0.97154919956156 | C | -0.87417383329132 | -6.94203845511107  | 0.30506892204054  |
| C | 3.20925233904417  | -1.77824133195497 | -0.20640662719913 | H | -1.13094025155102 | -7.59579280487140  | 1.12921092246500  |
| C | 3.55035721697822  | -3.14633046961654 | 0.03295665197259  | C | 6.29084087176744  | -1.25053658856112  | -0.18080136135567 |
| H | 4.52452393375900  | -3.50946834258371 | 0.32045581780720  | H | 6.04282029808604  | -1.77862575894677  | -1.09404926245654 |
| C | -0.42687862036307 | -6.66771868100075 | -2.04151934837736 | C | 9.63328410982479  | 0.15250694376756   | 2.92335127355767  |
| H | -0.33394758707662 | -7.06394635239574 | -3.04319514764588 | H | 9.14746039465013  | -0.24462466352689  | 3.81999302424042  |
| C | -0.06944028958597 | -3.29266581782553 | -0.34728334544707 | H | 9.41231311257970  | 1.22055526423843   | 2.83381598633052  |
| C | 1.33604354684559  | -2.91792452438536 | -0.38965249955697 | H | 10.70859294390636 | 0.01563437021966   | 3.01024304595095  |
| C | -0.20995833854226 | -5.31207268610694 | -1.82406304237653 | O | 1.00603962318776  | 8.58053871544156   | -1.92564921235486 |
| H | 0.04881163863362  | -4.67556892909231 | -2.66283653342982 | O | -9.28898265253839 | 0.78739130402057   | 1.51113808987640  |
| C | -0.32405059576417 | -4.75199077597411 | -0.56117004688192 | N | -1.65174486832054 | 1.62574685467336   | 0.29678770445606  |
| C | 3.48215940886347  | 1.87883750196980  | 0.00278473215198  | C | -6.08144207284569 | -0.00066019556285  | -0.09726360466372 |
| H | 4.48685026396811  | 2.18904495337467  | 0.27288433646516  | H | -5.68895520973559 | -0.46881297188981  | -0.99255189623414 |
| C | 3.88244190056110  | -0.60811056845118 | 0.05729957922931  | C | -1.08165241953477 | -2.44805877742312  | -0.02336428464806 |
| C | 5.28154195069418  | -0.58604954306577 | 0.52065461053207  | C | -2.35238623697173 | 3.75480248663096   | -0.15196368863408 |
| C | 7.93323191144992  | -0.52895561546791 | 1.41859463356047  | H | -2.32983068997189 | 4.78671216023140   | -0.46249574414501 |
| C | 2.43505649975856  | 2.81729685142611  | -0.23198132645435 | C | -3.01418874985870 | -0.65954787564038  | 0.49913949287213  |
| H | 2.59263868498553  | 3.87572520857662  | -0.04906603057243 | C | 0.77756208777148  | 7.31615658242370   | -1.50027845064568 |
| C | 6.94042379156344  | 0.13131432812752  | 2.13355483382797  | C | -2.96797929564132 | 1.69933764057445   | 0.45366756580437  |
|   |                   |                   |                   | C | -3.43916678502806 | 3.03641548008502   | 0.21162867766821  |
|   |                   |                   |                   | H | -4.4680907909825  | 3.35745902348010   | 0.25529601992186  |
|   |                   |                   |                   | C | 0.31760534322848  | 6.98324315397173   | -0.23243343757594 |

|    |                    |                   |                   |   |                   |                    |                   |
|----|--------------------|-------------------|-------------------|---|-------------------|--------------------|-------------------|
| H  | 0.12842476606233   | 7.74256209078241  | 0.51353478144095  | C | 7.31261177975747  | 0.07912761130941   | 1.61947119811839  |
| C  | 0.07771041532356   | 3.20552467296732  | -0.50001736361245 | H | 7.677805386301245 | 0.61338514288682   | 2.48524524940140  |
| C  | -1.20206615523433  | 2.86988813182446  | -0.12101732717994 | C | -1.03303048270429 | -9.12327418713884  | -2.33973899345339 |
| C  | 0.09658933193272   | 5.64924676914644  | 0.08753824818885  | H | -1.26060825369152 | -10.18571881308331 | -2.29023392363574 |
| H  | -0.25890003441763  | 5.39509379788437  | 1.07916395614668  | H | -0.05881028954513 | -8.98719456732933  | -2.81963599493738 |
| C  | 0.33372645649246   | 4.63366558235407  | -0.82796393090981 | H | -1.80180008404400 | -8.61755691046512  | -2.93246358002364 |
| C  | -3.42067372798189  | -2.03075532215237 | 0.40751630327099  | C | -0.55689753490128 | -5.61396661466561  | 0.86112875782695  |
| H  | -4.46238846791272  | -2.31452082444376 | 0.51443349162345  | H | -0.57484349594188 | -5.30214592587520  | 1.89966730582793  |
| C  | -3.72965566270012  | 0.48545006424413  | 0.62888140729478  | C | 7.66651736873458  | -1.32912751280956  | -0.30056615091919 |
| C  | -5.19913536488471  | 0.54583176989056  | 0.82271938838739  | H | 8.35261438878265  | -1.87841673853091  | -0.93243422093341 |
| C  | -7.96965702144528  | 0.67697619812512  | 1.22397442320865  | C | -0.79252891350569 | -6.93589388986090  | 0.54218341587574  |
| C  | -2.45142949044286  | -2.92274802862867 | 0.11253049501523  | H | -0.99484150851947 | -7.67170792704666  | 1.31045018280198  |
| H  | -2.68867192841773  | -3.97072175441082 | -0.03401934784834 | C | 6.31596087037809  | -1.30031193214711  | -0.57173642448902 |
| C  | -7.45739547137693  | 0.05619567962735  | 0.09196233825953  | H | 5.92813057347023  | -1.82425749921992  | -1.43728603697995 |
| H  | -8.11094651354376  | -0.37786180719698 | -0.65194501642975 | C | 10.07486747468850 | -0.06975658710466  | -2.10049305013442 |
| C  | 0.69989974310389   | 9.64310787768498  | -1.05254478465341 | H | 9.66569277821607  | -0.44255482775478  | 3.04452445100064  |
| H  | 0.92620534373093   | 10.55713392265790 | -1.59664843159102 | H | 9.91719919303220  | 1.01128455496220   | 2.03765488721155  |
| H  | -0.35955781706087  | 9.64070389981489  | -0.77753097227131 | H | 11.14155510191939 | -0.27821287443998  | 2.06589233529553  |
| H  | 1.30883951456889   | 9.60632332677114  | -0.14380881437941 | O | 0.88410165013546  | 8.53280809671190   | -1.70579832163266 |
| C  | 0.83005151172122   | 4.9856548407181   | -2.08627229284533 | O | 0.946019749946018 | 0.75421276901915   | 0.60140142939447  |
| H  | 1.03426072027684   | 4.20653850884199  | -2.81089348103924 | N | -1.7313335429184  | 1.63195360443622   | 0.75475902284467  |
| C  | -7.09547037898033  | 1.24159265429336  | 2.15184657054729  | C | -6.01280109076491 | -0.11695513592945  | -0.31975154045199 |
| H  | -7.51090317782228  | 1.72206904961943  | 3.02875699431737  | H | -5.46337526489025 | -0.64704908990182  | -1.08909184588246 |
| C  | 1.03829478084260   | 6.30420470855181  | -2.42466829277453 | C | -1.08992583079218 | -2.43479156157508  | 0.59833045426579  |
| H  | 1.40009381370926   | 6.58093885344694  | -3.40673387135723 | C | -2.38075503173230 | 3.71400969041262   | 0.05192660381066  |
| C  | -5.73418958391182  | 1.17653515222056  | 1.94899868069164  | H | -2.32343497659205 | 4.72022213288610   | -0.32934248209217 |
| H  | -5.06390615477534  | 1.61394965576802  | 2.68064482994021  | C | -3.10713393503355 | -0.67956682792612  | 0.77877843369579  |
| C  | -10.21603765025746 | 0.24621853998176  | 0.59885842453028  | C | 0.67091096906324  | 7.28063352073853   | -1.24083154261467 |
| H  | -10.13779677426641 | 0.72442295730886  | -0.38257031177419 | C | -3.05619128517074 | 1.68595918908965   | 0.68446259841084  |
| H  | -10.08335319600723 | -0.83444747350130 | 0.48599008943966  | C | 3.49900981245738  | 3.00051462088594   | 0.29092197912000  |
| H  | -11.20156379328089 | 0.44324471702530  | 1.01476745368644  | H | -4.52515936530988 | 3.30086819173752   | 0.14969041146727  |
| Rh | -1.06963380361135  | -0.43225374793583 | 0.26036186485462  | C | 0.24426093467943  | 6.98073567763807   | 0.04688345939531  |
| Cl | -0.83671795291070  | -0.11324482115903 | -2.08748792632222 | H | 0.06620247406729  | 7.75943823554454   | 0.77527760091983  |
| O  | -0.76840648422051  | -0.97507536559684 | 3.16256868747358  | C | 0.04920005685178  | 3.19450050396462   | -0.10367306727449 |
| C  | -0.89674360962831  | -0.75393302930056 | 2.05864028422229  | C | -1.22845601720088 | 2.84816671858463   | 0.28504153543276  |
| Pt | 1.30011341713979   | 0.29554951557897  | -0.84575705938155 | C | 0.04428021061494  | 5.65396231978586   | 0.41008297927251  |

## Coordinates for 5-Cl<sub>2</sub>

|    |                   |                   |                   |    |                    |                   |                   |
|----|-------------------|-------------------|-------------------|----|--------------------|-------------------|-------------------|
| Cl | 1.20791330205445  | 0.27305366624592  | 1.90806775753797  | H  | -0.28551349750369  | 5.42292099324022  | 1.41623099610141  |
| O  | -1.02313980221314 | -8.66146383114889 | -1.00879648174566 | C  | 0.26952834241147   | 4.61805580115214  | -0.48372147088253 |
| O  | 9.50935967063793  | -0.73838394511348 | 0.99512761162598  | C  | -3.47779313668825  | -2.06596056643681 | 0.70766580599378  |
| N  | 1.86957554729378  | -1.67122714004569 | -0.26915369119309 | H  | -4.51756826508528  | -2.37389589389891 | 0.68023926997069  |
| C  | 5.95636955450917  | 0.10617915031357  | 1.33064139370002  | C  | -3.83458611507305  | 0.46795594713277  | 0.76589927820902  |
| H  | 5.28603965354832  | 0.65153705425242  | 1.98441913573534  | C  | -5.31423373549857  | 0.52056372607392  | 0.69544578488664  |
| C  | 1.23213781157510  | 2.35714686376494  | -0.23612210078627 | C  | -8.11107817933636  | 0.63748007902878  | 0.57403866820423  |
| C  | 2.44245876708076  | -3.78210756366957 | 0.27866824255794  | C  | -2.46021447118873  | -2.94886870927525 | 0.62188657226809  |
| H  | 2.30533502120957  | -4.82460873306848 | 0.51926347588352  | H  | -2.65792718366048  | -4.00934548701562 | 0.51328721462209  |
| C  | 3.25053129224117  | 0.64878742921725  | -0.12381433743941 | C  | -7.40003929911304  | -0.06907410903685 | -0.38777841896379 |
| C  | -0.77390673483088 | -7.34761692152274 | -0.78923973563953 | H  | -7.90556437830143  | -0.57382073413156 | -1.19927164769724 |
| C  | 3.26015379915108  | -1.73828847697552 | -0.10883946289147 | C  | 0.60699257751739   | 9.61904091367040  | -0.85199285685023 |
| C  | 3.60593900914097  | -3.10079717758723 | 0.19856600272755  | H  | 0.82691296704727   | 10.51738568356217 | -1.42405392543720 |
| H  | 4.60364500832392  | -3.46786095001470 | 0.380934964443203 | H  | -0.44549446894550  | 9.63157599909011  | -0.55191827643060 |
| C  | -0.51010734829342 | -6.4190990035815  | -1.78875297647876 | H  | 1.23758902725469   | 9.59914337348062  | 0.04231398302515  |
| H  | -0.48871723899004 | -6.70838061636454 | -2.83022788707155 | C  | 0.72496338809605   | 4.93575140400566  | -1.76714573998853 |
| C  | -0.05531567668204 | -3.22296346435921 | 0.19659018920255  | H  | 0.91765796765427   | 4.13648521756976  | -2.47367766463311 |
| C  | 1.35228371917291  | -2.84276957383743 | 0.03830711960585  | C  | -7.42224188038037  | 1.29035193080752  | 1.59594327890529  |
| C  | -0.27324998499097 | -5.09316356830523 | -1.44860727482868 | H  | -7.99049520585503  | 1.83590702270807  | 2.33870457537407  |
| H  | -0.07456008577082 | -4.37129976211477 | -2.23305901235288 | C  | 0.91241876566814   | 6.24565867829704  | -2.14590313194221 |
| C  | -0.30044525672435 | -4.66633399542534 | -0.12988098063233 | H  | 1.24453396333386   | 6.49778740514506  | -3.14490433550446 |
| C  | 3.58598267262949  | 1.95522567025836  | -0.03898560970379 | C  | -6.04648535712544  | 1.23055706802161  | 1.65040595171455  |
| H  | 4.60915301375460  | 2.28873350569909  | 0.09379590704319  | H  | -5.52287612826371  | 1.73685608137680  | 2.45386365804014  |
| C  | 3.98758594305682  | -0.57820995925924 | -0.02752152895618 | C  | -10.20504972833181 | 0.11413381406920  | -0.40897434088426 |
| C  | 5.43723458772730  | -0.58238158631174 | 0.24193623981431  | H  | -9.94718480627564  | 0.49742812323747  | -1.40115867719123 |
| C  | 8.17510890997288  | -0.64357003588841 | 0.80213805860920  | H  | -10.05573359341535 | -0.97007775368423 | -0.39021674652848 |
| C  | 2.48686213338074  | 2.87780898667988  | -0.08651809239163 | H  | -11.24956638149380 | 0.33478196417516  | -0.20105285413412 |
| H  | 2.65637446781768  | 3.93642030948578  | 0.07457092543968  | Rh | -1.18055404181151  | -0.43644097379886 | 0.95284031441365  |
|    |                   |                   |                   | Cl | -0.99636321130741  | -0.19898584227120 | -1.39989223585536 |
|    |                   |                   |                   | O  | -1.50640888756833  | -0.99953502472663 | 3.86967978821348  |
|    |                   |                   |                   | C  | -1.37802586647763  | -0.76841289988626 | 2.77036528409668  |
|    |                   |                   |                   | Pt | 1.33424086105844   | 0.36329066582868  | -0.46414430648501 |
|    |                   |                   |                   | Cl | 1.83351421873262   | 0.55760701015283  | -2.70811586263873 |

**Table S6.** Cartesian coordinates of DFT ( $\omega$ B97-D3/def2-TZVP) optimized transition states  $[5]^\ddagger$  and  $[5\text{-Cl}_2]^\ddagger$ .

Coordinates for  $[5]^\ddagger$

|   |                   |                   |                   |
|---|-------------------|-------------------|-------------------|
| O | -6.54076647172076 | 6.51867659266585  | 0.01791560226223  |
| O | -6.42178500828242 | -6.57778880519167 | -0.39869474856472 |
| N | -2.17838894754030 | -0.00017176863059 | 0.16687471689032  |
| C | -4.46269253026173 | -3.81736385600776 | 1.02923302586451  |
| H | -4.35617929320691 | -3.26347772910674 | 1.95527183315326  |
| C | 1.28157151316613  | -2.71898884196119 | 0.03300194347804  |
| C | -4.38620355590919 | 0.70865141448844  | 0.09925050932707  |
| H | -5.23379961639038 | 1.37501272242720  | 0.10092433716597  |
| C | -1.28232804599697 | -2.71910142486756 | 0.03240577245938  |
| C | -5.61333687795088 | 5.53308562771367  | -0.00396590762262 |
| C | -3.00794779807255 | -1.05798482470276 | 0.08556579153583  |
| C | -4.38875740918194 | -0.63312408230297 | 0.03996811417616  |
| H | -5.23450292896321 | -1.29798751901328 | -0.03082324970396 |
| C | -5.30709143592465 | 4.76474451317382  | -1.12084496152894 |
| H | -5.80539609578083 | 4.92523663153031  | -2.06664427630816 |
| C | -2.63657627461353 | 2.46122619367929  | 0.24300670851852  |
| C | -3.00667724349901 | 1.13543971302954  | 0.17135743996481  |
| C | -4.34089454982206 | 3.77182433105329  | -1.02555220480491 |
| H | -4.09759279572549 | 3.17870156460085  | -1.89937949857434 |
| C | -3.67359044302791 | 3.52586289170667  | 0.16461232360520  |
| C | -0.67606779482239 | -4.03153426019948 | 0.00747358768951  |
| H | -1.27379072553440 | -4.93654285621944 | 0.00228156297249  |
| C | -2.61431857381542 | -2.43372979808634 | 0.0347745546451   |
| C | -3.64899392510084 | -3.50202655283624 | -0.04922439579992 |
| C | -5.54226957770816 | -5.56224405041258 | -0.22094128806874 |
| C | 0.67540344576999  | -4.03147581578054 | 0.00781753527518  |
| H | 1.27319205830368  | -4.93644386204793 | 0.00291108506331  |
| C | -5.40691196317570 | -4.83447582254115 | 0.95541493221980  |
| H | -6.01772743211576 | -5.05129919713390 | 1.82071866236393  |
| C | -7.26011201524440 | 6.78412091047589  | -1.16478508742520 |
| C | -3.98027018686451 | 4.31574664739741  | 1.27275304614151  |
| H | -3.46598683067944 | 4.14122973158924  | 2.21085749351408  |
| C | -4.73414801657714 | -5.25597212241596 | -1.31381795742590 |
| H | -4.85386823497991 | -5.82753242850823 | -2.2255490333386  |
| C | -4.93926436439709 | 5.30360728607637  | 1.19456682543031  |
| H | -5.18969917861427 | 5.91173139567531  | 2.05455739767490  |
| C | -3.80527973780957 | -4.24009958942556 | -1.22386763828447 |
| H | -3.18359553607784 | -4.00463733632001 | -2.08003705475172 |
| C | -7.28522579250439 | -6.90490526832269 | 0.66488375643144  |
| O | 6.42102746969805  | -6.57836058721193 | -0.39254053635189 |
| O | 6.54234689803256  | 6.51785347951795  | 0.00989222484348  |
| N | 2.17861364502877  | 0.00012990507042  | 0.16715044250936  |
| C | 4.34205791130764  | 3.76944085025933  | -1.02845064018044 |
| H | 4.09850073650809  | 3.17489140639852  | -1.90123384068379 |
| C | -1.27820906489646 | 2.83899574544468  | 0.34018121097099  |
| C | 4.38868373228678  | -0.63387860761567 | 0.04076061681329  |
| H | 5.23413360632215  | -1.29917608284460 | -0.02948125891589 |
| C | 1.27942837728341  | 2.83914493387716  | 0.34004828871413  |
| C | 5.54140702349682  | -5.56270308039223 | -0.21594690796679 |
| C | 3.00742010434213  | 1.13534868414153  | 0.17104608744204  |
| C | 4.38675459086015  | 0.70793511863873  | 0.09913934604690  |
| H | 5.23465878105149  | 1.37390577479934  | 0.10047739768696  |
| C | 5.40450078024493  | -4.83502599319864 | 0.96028269824820  |
| H | 6.01408939609770  | -5.05197973704448 | 1.82641757675192  |
| C | 2.61359589120644  | -2.43375170318055 | 0.03609740274891  |
| C | 3.00765816471986  | -1.05810854090561 | 0.08644888905216  |
| C | 4.46032776354215  | -3.81779069524611 | 1.03286438206557  |
| H | 4.35261523691034  | -3.26393972275709 | 1.95878482523414  |
| C | 3.64817607356384  | -3.50224724995399 | -0.04669523180771 |
| C | 0.70924351791922  | 4.08392188882359  | 0.36865053645628  |
| H | 1.29736944664343  | 4.99530911914005  | 0.35012884072395  |
| C | 2.63772862293104  | 2.46125859353509  | 0.24228287561418  |
| C | 3.67488150747151  | 3.52561509416299  | 0.16223940385798  |

|    |                   |                   |                   |
|----|-------------------|-------------------|-------------------|
| C  | 5.61483484718293  | 5.53230373930652  | -0.01010787491839 |
| C  | -0.70814381162655 | 4.08383873339337  | 0.36879870927623  |
| H  | -1.29638412799882 | 4.99515745131435  | 0.35048891588289  |
| C  | 5.30835942098560  | 4.76206752454283  | -1.12561332873489 |
| H  | 5.80651901674235  | 4.92088864707384  | -2.07177072892525 |
| C  | 7.28259358427578  | -6.90594332715775 | 0.67242213240945  |
| C  | 3.80600151029109  | -4.24022411242139 | -1.22118216898332 |
| H  | 3.18552972423121  | -4.00461422739930 | -2.07819094011926 |
| C  | 4.94093555286396  | 5.30496303086173  | 1.18893120652368  |
| H  | 5.19159725510311  | 5.91451731847125  | 2.04784287645583  |
| C  | 4.73486405562058  | -5.25620907511056 | -1.30992836076644 |
| H  | 4.85578861216652  | -5.82771205842701 | -2.22154163017324 |
| C  | 3.98181836165013  | 4.31735566538732  | 1.26898334773042  |
| H  | 3.46770875798682  | 4.14451506546927  | 2.20749328268671  |
| Cl | 0.00063301148014  | 1.49292021031494  | -2.03984012601172 |
| O  | -0.00517308730771 | 1.29430035241886  | 3.29027158935487  |
| C  | -0.00135108091808 | 1.30188285032261  | 2.16017222436450  |
| H  | -7.94150200054421 | 7.59810645852005  | -0.92846638219666 |
| H  | -6.59580950454354 | 7.09521223607144  | -1.97684309137269 |
| H  | -7.83885186125993 | 5.91192318370567  | -1.48452643382183 |
| H  | -7.90430865343281 | -7.72688631094472 | 0.312701522280368 |
| H  | -6.72875657554683 | -7.22925626008463 | 1.54984595005903  |
| H  | -7.92811474857190 | -6.06018806262187 | 0.93216541620713  |
| H  | 6.72452840546533  | -7.23005986767015 | 1.55646610509670  |
| H  | 7.90186709795364  | -7.72819688653660 | 0.32121488777299  |
| H  | 7.92544047116573  | -6.06153590163360 | 0.94078743444071  |
| C  | 7.26160601018307  | 6.78114153644834  | -1.17333547568496 |
| H  | 7.94304363183196  | 7.59552042821655  | -0.93850897521228 |
| H  | 7.84030080819671  | 5.90835502348854  | -1.49155044362549 |
| H  | 6.59726192423152  | 7.09079833352798  | -1.98590634599171 |
| Pt | -0.00047342926261 | -1.27599812500039 | 0.06953940774582  |
| Rh | 0.00072879948494  | 1.37316847744544  | 0.28252938140875  |

Coordinates for  $[5\text{-Cl}_2]^\ddagger$

|   |                   |                   |                   |
|---|-------------------|-------------------|-------------------|
| O | 6.40258527780037  | 6.48521421555624  | -0.43447677139281 |
| O | 6.54958678958154  | -6.60847492202437 | -0.05266103465828 |
| N | 2.17275046671390  | -0.10938907727519 | 0.15332623479678  |
| C | 4.33983090908038  | -3.85060451638915 | -1.03890707658531 |
| H | 4.08983883735820  | -3.24377695620509 | -1.90128972889937 |
| C | -1.28238650466517 | -2.94789255542758 | 0.39517106745368  |
| C | 4.37457943785743  | 0.53414181428535  | 0.00267171670921  |
| H | 5.21564647984082  | 1.20409995020122  | -0.07308163591238 |
| C | 1.28037727915239  | -2.94795195532498 | 0.39540320127159  |
| C | 5.53300729259951  | 5.46499127098863  | -0.24554072301629 |
| C | 3.00661318271272  | -1.24356983238120 | 0.14975031566603  |
| C | 4.38124394612981  | -0.80910820176033 | 0.05772510227944  |
| H | 5.23439837515426  | -1.46794221763391 | 0.05285124517064  |
| C | 5.40558808639121  | 4.74875062818284  | 0.93950010375103  |
| H | 6.01652031055943  | 4.97991144550231  | 1.80088402457477  |
| C | 2.61196383931098  | 2.34290501146905  | 0.04824829377614  |
| C | 2.99310465745019  | 0.94835569431014  | 0.06926172735297  |
| C | 4.46714001359449  | 3.72794814153268  | 1.02768928044099  |
| H | 4.36055121395092  | 3.18490026819246  | 1.95994950050911  |
| C | 3.65542924483851  | 3.40216600932668  | -0.04811792421255 |
| C | 0.70958186814265  | -4.19010111291298 | 0.47183043848141  |
| H | 1.29385305305562  | -5.10387267938784 | 0.47465071190172  |
| C | 2.63904008173375  | -2.56931820786244 | 0.25456249025920  |
| C | 3.67570081130473  | -3.62982347745319 | 0.15846028034417  |
| C | 5.61952035704666  | -5.62631736549873 | -0.05293203752734 |
| C | -0.71167449740908 | -4.19006357347250 | 0.47169458764705  |
| H | -1.29600740709196 | -5.10379608427817 | 0.47441698028698  |
| C | 5.30748937131428  | -4.83890211965706 | -1.15511745973148 |
| H | 5.80224603234562  | -4.9816598255371  | -2.10553616528730 |
| C | 7.26518279790061  | 6.83365101531383  | 0.62384982072441  |



|   |                   |                   |                   |    |                   |                   |                   |
|---|-------------------|-------------------|-------------------|----|-------------------|-------------------|-------------------|
| C | 3.80045435830935  | 4.12514435718648  | -1.23291113864599 | C  | 0.67642359299718  | 3.98508645554075  | 0.09435867830241  |
| H | 3.17221792019259  | 3.87678875322564  | -2.08089999333853 | H  | 1.27079854832112  | 4.89040187071548  | 0.11360539130372  |
| C | 4.94857182632250  | -5.42121677231073 | 1.15201450269762  | C  | -5.40290529253098 | 4.75041253268526  | 0.9397759617252   |
| H | 5.20464564042589  | -6.04310289496470 | 2.00033737205053  | H  | -6.01357046083778 | 4.98180302337885  | 1.80128863358039  |
| C | 4.72504241336938  | 5.14340088379737  | -1.33482542137100 | C  | -7.27508323946076 | -6.84286761793647 | -1.24046210308383 |
| H | 4.83888851907617  | 5.70767563075025  | -2.25173480273069 | C  | -3.98847065489953 | -4.43813493122433 | 1.25124957646927  |
| C | 3.98633553115043  | -4.43863413371738 | 1.25177924406561  | H  | -3.47835864388816 | -4.28109890308884 | 2.19470446257022  |
| H | 3.47649895850049  | -4.28125949728914 | 2.19532693270795  | C  | -4.72248905919470 | 5.14496689056130  | -1.33460242126906 |
| C | 7.27183189253962  | -6.84460390999773 | -1.24021537492323 | H  | -4.83613306666803 | 5.70944748226467  | -2.25141037893832 |
| O | -6.55247871671426 | -6.60715599429187 | -0.05304431572232 | C  | -4.95094772200686 | -5.42047931110743 | 1.15150782663887  |
| O | -6.39900162933318 | 6.48774168999698  | -0.43375944741017 | H  | -5.20693321131794 | -6.04251177809310 | 1.99974971154837  |
| N | -2.17315798522008 | -0.10953112259110 | 0.15297416711706  | C  | -3.79849153286093 | 4.12614218336198  | -1.23297584101191 |
| C | -4.46504633833154 | 3.72904591915353  | 1.02767359912964  | H  | -3.17052131631602 | 3.87755271795135  | -2.08109377763443 |
| H | -4.35862387623137 | 3.18581401949839  | 1.95984596078582  | Cl | 0.00051595404655  | 1.36163436788921  | 2.42061139592831  |
| C | 1.31233770932598  | 2.69775583659573  | 0.07695642037787  | H  | 7.87465648557941  | 7.65759551743191  | 0.25991613628057  |
| C | -4.38215051631560 | -0.80764870027745 | 0.05692940649333  | H  | 6.70699599105475  | 7.16310642264437  | 1.50568266488451  |
| H | -5.23579273077581 | -1.46585317437754 | 0.05186383466851  | H  | 7.91706229892665  | 5.99869940397592  | 0.89922060942188  |
| C | -1.31093052326242 | 2.69767750515970  | 0.07674401497961  | H  | 7.95806987989690  | -7.65888575704277 | -1.01981576462247 |
| C | -5.62224759449473 | -5.62515639039226 | -0.05331518234280 | H  | 6.61030871007082  | -7.14276200927933 | -2.05923654923344 |
| C | -2.99265084525863 | 0.94883957257623  | 0.06879420704151  | H  | 7.84534707205036  | -5.96220158925589 | -1.54062050449549 |
| C | -4.37445081780807 | 0.53559787609690  | 0.00189790720197  | H  | -6.61383414747358 | -7.14092820683461 | -2.05974041526138 |
| H | -5.21500531709827 | 1.20617865557895  | -0.07403069249670 | H  | -7.96139502851900 | -7.65709223109528 | -1.02008058608081 |
| C | -5.31036601174392 | -4.83752004083183 | -1.15538439382288 | H  | -7.84853891652903 | -5.96029853486083 | -1.54049041311610 |
| H | -5.80540526908480 | -4.97994966558023 | -2.10570510126019 | C  | -7.26092416040381 | 6.83681560657723  | 0.62491070335957  |
| C | -2.64094696732952 | -2.56897318566301 | 0.25413941095859  | H  | -7.86973643940101 | 7.66139881278721  | 0.26131658031035  |
| C | -3.00785983704267 | -1.24307032264015 | 0.14923119904511  | H  | -7.91350278697917 | 6.00243617864088  | 0.90036292357807  |
| C | -4.34245904373962 | -3.84946116741559 | -1.03919635194722 | H  | -6.70212361938327 | 7.16558809219016  | 1.50661035661920  |
| H | -4.09254769592644 | -3.24250559060088 | -1.90151154005222 | C  | -0.00118403039891 | -1.52391500943396 | 2.21097354520358  |
| C | -3.67792818747447 | -3.62913490621458 | 0.15803576027738  | O  | -0.00138366397068 | -1.77284028833021 | 3.31223222400109  |
| C | -0.67503355872932 | 3.98505094414402  | 0.09425814944553  | Cl | -0.00073824605964 | -1.89105382359364 | -1.98762625173077 |
| H | -1.26941137080055 | 4.89036562402847  | 0.11341771310522  | Cl | 0.00094135396554  | 1.42135703075451  | -2.20618316125624 |
| C | -2.61067544190035 | 2.34318682398758  | 0.04791089796539  | Pt | 0.00076053399510  | 1.25965342817059  | 0.09350649373616  |
| C | -3.65368281007628 | 3.40293839915324  | -0.04829622084218 | Rh | -0.00096222192044 | -1.49806186386950 | 0.30774176374916  |
| C | -5.53006324815941 | 5.46691405838825  | -0.24513339530630 |    |                   |                   |                   |

**Table S7.** Cartesian coordinates of DFT optimized (b3pw91/6-31G(d,p) and SDD for Pt, Rh, Te) geometries of 4-Rh(CO)<sub>2</sub>Cl.

| Coordinates for 4-Rh(CO) <sub>2</sub> Cl-1 |            |            |            | Coordinates for 4-Rh(CO) <sub>2</sub> Cl-2 |           |            |            |
|--------------------------------------------|------------|------------|------------|--------------------------------------------|-----------|------------|------------|
|                                            |            |            |            | C                                          | 2.0306960 | 10.5428640 | 7.5090180  |
|                                            |            |            |            | C                                          | 2.0790000 | 4.7143760  | 12.5524820 |
|                                            |            |            |            | H                                          | 2.8614060 | 4.0725100  | 12.9476580 |
| O                                          | 3.4299850  | 13.4395420 | 4.8448480  | C                                          | 3.6394940 | 6.4802270  | 11.5513320 |
| O                                          | 8.6571360  | 4.4275560  | 13.1444240 | C                                          | 4.9376390 | 5.9009090  | 11.9586180 |
| N                                          | 2.4013890  | 8.1343850  | 10.3505490 | C                                          | 7.4321940 | 4.8401110  | 12.7329570 |
| C                                          | 5.2510450  | 4.5549680  | 11.7365690 | C                                          | 0.7382840 | 4.3119730  | 12.6297700 |
| H                                          | 4.5339660  | 3.9159420  | 11.2293090 | H                                          | 0.5018020 | 3.3308530  | 13.0332090 |
| C                                          | -0.2710550 | 5.1289440  | 12.1024170 | C                                          | 6.4817870 | 4.0211820  | 12.1143520 |
| C                                          | 4.0063120  | 9.0748640  | 9.0404360  | H                                          | 6.6903530 | 2.9765940  | 11.9123310 |
| H                                          | 4.4537200  | 9.6591050  | 8.2486070  | C                                          | 3.9051820 | 14.6875850 | 5.3062770  |
| C                                          | 2.4125300  | 5.8987680  | 11.8927210 | H                                          | 4.2048330 | 15.2445880 | 4.4172200  |
| C                                          | 2.9905660  | 12.5437640 | 5.7665350  | H                                          | 4.7738280 | 14.5719450 | 5.9675480  |
| C                                          | 3.5997300  | 7.6159320  | 10.7002350 | H                                          | 3.1242120 | 15.2488880 | 5.8356180  |
| C                                          | 4.6389530  | 8.2278480  | 9.9034790  | C                                          | 2.0614090 | 10.3400750 | 6.1179110  |
| H                                          | 5.6945290  | 7.9979660  | 9.9530600  | H                                          | 1.7189620 | 9.3917840  | 5.7125630  |
| C                                          | 2.9710320  | 12.7654040 | 7.1468060  | C                                          | 7.1359290 | 6.1916870  | 12.9574300 |
| H                                          | 3.3149420  | 13.7032510 | 7.5685920  | H                                          | 7.8822400 | 6.8122640  | 13.4431780 |
| C                                          | 1.5518430  | 9.4840180  | 8.4510340  | C                                          | 2.5345840 | 11.3194040 | 5.2582670  |
| C                                          | 2.5733340  | 8.9616260  | 9.2919100  | H                                          | 2.5672370 | 11.1593880 | 4.1850450  |
| C                                          | 2.5002720  | 11.7660380 | 7.9990300  | C                                          | 5.9104350 | 6.7104740  | 12.5729080 |
| H                                          | 2.4852650  | 11.9468580 | 9.0703480  | H                                          | 5.6860040 | 7.7556260  | 12.7663090 |



|    |            |            |            |                                            |            |            |            |
|----|------------|------------|------------|--------------------------------------------|------------|------------|------------|
| C  | 9.0020300  | 3.0700800  | 12.9538810 | Pt                                         | -0.8245210 | 7.5617950  | 9.3560440  |
| H  | 9.0112310  | 2.7994120  | 11.8900750 | C                                          | 0.1538750  | 9.7890590  | 15.0048630 |
| H  | 8.3181740  | 2.3994430  | 13.4899320 | O                                          | 0.0226450  | 10.4713890 | 15.9180700 |
| H  | 10.0078170 | 2.9543990  | 13.3602610 | Cl                                         | 0.3092220  | 6.8816550  | 15.0657650 |
| O  | -3.3948860 | 0.4746180  | 15.1911290 | C                                          | 0.4394310  | 10.0942320 | 12.3639740 |
| O  | -8.3270340 | 8.6208010  | 5.6228290  | O                                          | 0.4892760  | 11.0181960 | 11.6768990 |
| N  | -2.3194760 | 6.2960940  | 10.0932910 |                                            |            |            |            |
| C  | -5.2616500 | 9.1841640  | 7.5947700  | Coordinates for 4-Rh(CO) <sub>2</sub> Cl-2 |            |            |            |
| H  | -4.7110400 | 9.9902110  | 8.0709840  |                                            |            |            |            |
| C  | 0.2042000  | 9.0293050  | 8.3995710  | O                                          | 3.3973320  | 13.5465910 | 4.9892630  |
| C  | -3.9878270 | 5.1245850  | 11.1123770 | O                                          | 8.6448440  | 4.3261050  | 13.1139440 |
| H  | -4.4784740 | 4.4784840  | 11.8260580 | N                                          | 2.4112560  | 8.0635130  | 10.3129780 |
| C  | -2.3145860 | 8.1876480  | 8.2217520  | C                                          | 5.2262720  | 4.4807150  | 11.7384900 |
| C  | -3.0002900 | 1.4620890  | 14.3484620 | H                                          | 4.4932830  | 3.8434210  | 11.2521520 |
| C  | -3.5212290 | 6.5896460  | 9.4845410  | C                                          | -0.2827420 | 5.1729670  | 12.1676640 |
| C  | -4.5749110 | 5.8574080  | 10.1216790 | C                                          | 4.0060850  | 9.0348460  | 9.0199440  |
| H  | -5.6251140 | 5.9200910  | 9.8737150  | H                                          | 4.4492210  | 9.6358360  | 8.2382970  |
| C  | -3.1599190 | 1.4326170  | 12.9590790 | C                                          | 2.4106350  | 5.8815910  | 11.8987530 |
| H  | -3.6141840 | 0.5809970  | 12.4651020 | C                                          | 2.9635620  | 12.6126680 | 5.8756190  |
| C  | -1.6229020 | 4.7728820  | 11.9670780 | C                                          | 3.6094660  | 7.5498760  | 10.6581170 |
| C  | -2.5625690 | 5.3955510  | 11.0923780 | C                                          | 4.6442780  | 8.1739330  | 9.8654860  |
| C  | -2.7198210 | 2.5111660  | 12.1928110 | H                                          | 5.7012770  | 7.9496630  | 9.9099330  |
| H  | -2.8358570 | 2.4752570  | 11.1130280 | C                                          | 2.9180350  | 12.7904650 | 7.2616340  |
| C  | -2.1116280 | 3.6267090  | 12.7805340 | H                                          | 3.2337530  | 13.7219820 | 7.7180030  |
| C  | -1.9860950 | 9.2620290  | 7.3784190  | C                                          | 1.5502270  | 9.4488540  | 8.4465300  |
| H  | -2.6990970 | 9.7357510  | 6.7066830  | C                                          | 2.5738300  | 8.9145460  | 9.2735800  |
| C  | -3.5524740 | 7.5607830  | 8.4535430  | C                                          | 2.4567990  | 11.7554410 | 8.0753790  |
| C  | -4.7977580 | 7.8689530  | 7.7225640  | H                                          | 2.4177990  | 11.9003390 | 9.1515850  |
| C  | -7.1746860 | 8.4484300  | 6.3180720  | C                                          | 2.0216660  | 10.5391750 | 7.5380990  |
| C  | -0.6748390 | 9.7080120  | 7.4920560  | C                                          | 2.0654190  | 4.7191830  | 12.5955220 |
| H  | -0.3427000 | 10.5679950 | 6.9153150  | H                                          | 2.8419100  | 4.0693490  | 12.9902660 |
| C  | -6.4352570 | 9.4808880  | 6.9041190  | C                                          | 3.6440920  | 6.4274260  | 11.5286960 |
| H  | -6.7662950 | 10.5114010 | 6.8409220  | C                                          | 4.9374190  | 5.8361320  | 11.9344690 |
| C  | -4.0214390 | -0.6641720 | 14.6368030 | C                                          | 7.4224060  | 4.7502640  | 12.7061420 |
| H  | -4.2595150 | -1.3172860 | 15.4776590 | C                                          | 0.7199460  | 4.3468830  | 12.7034930 |
| H  | -4.9489720 | -0.4014650 | 14.1117220 | H                                          | 0.4724120  | 3.3780960  | 13.1305010 |
| H  | -3.3560790 | -1.1972200 | 13.9451910 | C                                          | 6.4519900  | 3.9343930  | 12.1153330 |
| C  | -1.9469220 | 3.6321340  | 14.1789620 | H                                          | 6.6412260  | 2.8824410  | 11.9333600 |
| H  | -1.4780790 | 4.4908080  | 14.6528890 | C                                          | 3.8333620  | 14.7908260 | 5.4972340  |
| C  | -6.7263750 | 7.1255240  | 6.4381710  | H                                          | 4.1327750  | 15.3829610 | 4.6310260  |
| H  | -7.3084450 | 6.3370540  | 5.9715010  | H                                          | 4.6941090  | 14.6761860 | 6.1689450  |
| C  | -2.3906620 | 2.5719300  | 14.9516500 | H                                          | 3.0302620  | 15.3154550 | 6.0309940  |
| H  | -2.2800030 | 2.5799490  | 16.0313940 | C                                          | 2.0770550  | 10.3797610 | 6.1425480  |
| C  | -5.5601410 | 6.8445370  | 7.1307380  | H                                          | 1.7611090  | 9.4378080  | 5.7021830  |
| H  | -5.2140990 | 5.8170560  | 7.2011710  | C                                          | 7.1508680  | 6.1110830  | 12.9044730 |
| C  | -8.8204340 | 9.9362560  | 5.4671200  | H                                          | 7.9131200  | 6.7297210  | 13.3674820 |
| H  | -9.0569510 | 10.3977350 | 6.4345850  | C                                          | 2.5425440  | 11.3956770 | 5.3216270  |
| H  | -8.1084350 | 10.5749480 | 4.9286110  | H                                          | 2.5949680  | 11.2707670 | 4.2445190  |
| H  | -9.7359340 | 9.8477830  | 4.8804200  | C                                          | 5.9300580  | 6.6421620  | 12.5212760 |
| Rh | 0.3661160  | 8.6657800  | 13.5387010 | H                                          | 5.7260420  | 7.6954720  | 12.6922840 |
| Te | 0.6343930  | 6.9505660  | 11.4296370 |                                            |            |            |            |

|    |            |            |            |    |            |            |            |
|----|------------|------------|------------|----|------------|------------|------------|
| C  | 8.9682090  | 2.9610190  | 12.9415020 | Pt | -0.8255930 | 7.5393640  | 9.3616680  |
| H  | 8.9603830  | 2.6730520  | 11.8822550 | C  | 0.5951210  | 7.3182350  | 14.7559290 |
| H  | 8.2817120  | 2.3087400  | 13.4966320 | O  | 0.6754150  | 6.4825010  | 15.5482030 |
| H  | 9.9772040  | 2.8375050  | 13.3375110 | C  | 0.2868490  | 9.9747000  | 14.8960210 |
| O  | -3.4224290 | 0.4453530  | 15.1606110 | Cl | 0.2620190  | 10.4799790 | 12.0258190 |
| O  | -8.3207230 | 8.5504040  | 5.6016700  | O  | 0.1850980  | 10.7662510 | 15.7205040 |
| N  | -2.3258180 | 6.3003270  | 10.1267360 |    |            |            |            |
| C  | -5.2560570 | 9.1384270  | 7.5676600  |    |            |            |            |
| H  | -4.7050540 | 9.9502850  | 8.0333720  |    |            |            |            |
| C  | 0.2037220  | 8.9881710  | 8.3880160  |    |            |            |            |
| C  | -3.9982650 | 5.1508860  | 11.1636270 | O  | 3.4902860  | 13.2326690 | 4.9336770  |
| H  | -4.4917750 | 4.5181190  | 11.8873750 | O  | 8.5427320  | 4.1232460  | 12.9608590 |
| C  | -2.3094860 | 8.1428980  | 8.2095760  | N  | 2.4255110  | 8.4734470  | 10.8792280 |
| C  | -3.0223060 | 1.4502290  | 14.3419460 | C  | 5.0616110  | 4.5563330  | 11.8252610 |
| C  | -3.5256850 | 6.5812470  | 9.5070250  | H  | 4.2749190  | 4.0049350  | 11.3180470 |
| C  | -4.5822550 | 5.8643630  | 10.1572570 | C  | -0.2696610 | 5.0853450  | 12.4137020 |
| H  | -5.6316440 | 5.9227900  | 9.9048100  | C  | 3.9310680  | 8.8563140  | 9.1840300  |
| C  | -3.1527910 | 1.4433430  | 12.9494870 | H  | 4.3209100  | 9.1992810  | 8.2361620  |
| H  | -3.5881170 | 0.5958600  | 12.4319230 | C  | 2.3340890  | 6.0322080  | 12.3179240 |
| C  | -1.6330790 | 4.8124620  | 12.0283830 | C  | 3.0498290  | 12.4098680 | 5.9180300  |
| C  | -2.5725570 | 5.4218700  | 11.1423710 | C  | 3.5630190  | 7.7239850  | 11.0916930 |
| C  | -2.7090340 | 2.5390260  | 12.2101250 | C  | 4.5310780  | 8.0075910  | 10.0748650 |
| H  | -2.8042560 | 2.5198850  | 11.1280330 | H  | 5.4980300  | 7.5318780  | 9.9882060  |
| C  | -2.1257130 | 3.6533740  | 12.8252820 | C  | 3.2597930  | 12.6192230 | 7.2849960  |
| C  | -1.9807680 | 9.2092100  | 7.3566760  | H  | 3.8040010  | 13.4860960 | 7.6425780  |
| H  | -2.6938380 | 9.6792190  | 6.6825190  | C  | 1.5471770  | 9.6003730  | 8.8227610  |
| C  | -3.5513020 | 7.5260210  | 8.4531650  | C  | 2.5838970  | 9.0711500  | 9.6429430  |
| C  | -4.7947120 | 7.8243060  | 7.7151100  | C  | 2.7633220  | 11.6992640 | 8.2065760  |
| C  | -7.1691750 | 8.3864430  | 6.3004380  | H  | 2.9322610  | 11.8668560 | 9.2672280  |
| C  | -0.6712180 | 9.6605630  | 7.4732580  | C  | 2.0372310  | 10.5700240 | 7.8036090  |
| H  | -0.3401140 | 10.5208000 | 6.8965690  | C  | 2.0770600  | 4.7846920  | 12.9157810 |
| C  | -6.4287180 | 9.4263790  | 6.8718130  | H  | 2.9017000  | 4.1746330  | 13.2727520 |
| H  | -6.7581630 | 10.4563460 | 6.7934420  | C  | 3.5615520  | 6.5837710  | 11.9276670 |
| C  | -4.0244090 | -0.6916180 | 14.5750580 | C  | 4.8462410  | 5.8909730  | 12.1886100 |
| H  | -4.2716400 | -1.3609860 | 15.4002680 | C  | 7.3186280  | 4.6364410  | 12.6782780 |
| H  | -4.9440840 | -0.4306190 | 14.0356920 | C  | 0.7733890  | 4.2947060  | 12.9377740 |
| H  | -3.3387710 | -1.2052920 | 13.8887620 | H  | 0.5809240  | 3.2774550  | 13.2678560 |
| C  | -1.9924380 | 3.6338080  | 14.2257820 | C  | 6.2824310  | 3.9266050  | 12.0618740 |
| H  | -1.5425530 | 4.4849580  | 14.7285300 | H  | 6.4163030  | 2.8961590  | 11.7522680 |
| C  | -6.7233300 | 7.0646920  | 6.4406640  | C  | 4.2233290  | 14.3831380 | 5.3058800  |
| H  | -7.3064050 | 6.2703470  | 5.9853340  | H  | 4.4798530  | 14.8914620 | 4.3752700  |
| C  | -2.4378910 | 2.5570060  | 14.9744870 | H  | 5.1460170  | 14.1205240 | 5.8389640  |
| H  | -2.3488660 | 2.5488260  | 16.0562210 | H  | 3.6265200  | 15.0586470 | 5.9320680  |
| C  | -5.5581900 | 6.7921920  | 7.1385690  | C  | 1.8457660  | 10.3754460 | 6.4222010  |
| H  | -5.2139090 | 5.7653290  | 7.2251560  | H  | 1.3170690  | 9.4904740  | 6.0792440  |
| C  | -8.8112460 | 9.8644170  | 5.4256420  | C  | 7.1202070  | 5.9768650  | 13.0369300 |
| H  | -9.0478310 | 10.3409070 | 6.3857730  | H  | 7.9361520  | 6.5132800  | 13.5109540 |
| H  | -8.0973330 | 10.4934890 | 4.8784550  | C  | 2.3430130  | 11.2750390 | 5.4935560  |
| H  | -9.7262860 | 9.7689950  | 4.8392860  | H  | 2.2072460  | 11.1180670 | 4.4280630  |
| Rh | 0.4519090  | 8.7063630  | 13.5455940 | C  | 5.9055140  | 6.5957250  | 12.7898070 |
| Te | 0.6525920  | 6.9811360  | 11.4392740 | H  | 5.7525070  | 7.6336280  | 13.0720820 |

Coordinates for 4-Rh(CO)<sub>2</sub>Cl-3

|    |            |            |            |    |            |            |            |
|----|------------|------------|------------|----|------------|------------|------------|
| C  | 8.7953230  | 2.7753870  | 12.6208240 | O  | 1.9282380  | 12.3256800 | 14.3550850 |
| H  | 8.7156290  | 2.6076920  | 11.5387950 | C  | 1.9750500  | 11.4874250 | 13.5699260 |
| H  | 8.1129160  | 2.0908950  | 13.1413510 | Cl | 4.3216680  | 9.9829300  | 13.0631840 |
| H  | 9.8185170  | 2.5701700  | 12.9390860 | Pt | -0.7887910 | 7.6252930  | 9.7464400  |
| O  | -3.2077240 | -0.0746060 | 14.8488440 | C  | 0.3278530  | 10.4932660 | 11.8213030 |
| O  | -8.2330990 | 8.6131810  | 5.8733200  | O  | -0.7469330 | 10.8459950 | 11.6022630 |
| N  | -2.2685160 | 6.2651990  | 10.3890050 |    |            |            |            |
| C  | -5.2697290 | 9.1643280  | 7.9989170  |    |            |            |            |
| H  | -4.7805880 | 9.9539530  | 8.5620370  |    |            |            |            |
| C  | 0.1951260  | 9.1604270  | 8.8370470  |    |            |            |            |
| C  | -3.9165600 | 4.9318480  | 11.2383020 | O  | 3.4704080  | 13.3495260 | 4.9354270  |
| H  | -4.3991670 | 4.2053440  | 11.8763360 | O  | 8.4803450  | 3.9261730  | 12.5427050 |
| C  | -2.2820370 | 8.2474350  | 8.6173110  | N  | 2.4472740  | 8.6006620  | 10.8884120 |
| C  | -2.8405770 | 1.0192470  | 14.1364330 | C  | 4.9734300  | 4.6043540  | 11.6257550 |
| C  | -3.4600050 | 6.5391490  | 9.7502410  | H  | 4.1306950  | 4.1229930  | 11.1380100 |
| C  | -4.5003640 | 5.7112610  | 10.2831290 | C  | -0.2577580 | 5.2379170  | 12.4475770 |
| H  | -5.5402430 | 5.7404610  | 9.9896180  | C  | 3.9517580  | 9.0367040  | 9.2075330  |
| C  | -2.9121320 | 1.1242870  | 12.7435410 | H  | 4.3368750  | 9.4024460  | 8.2660860  |
| H  | -3.2691360 | 0.2991400  | 12.1375480 | C  | 2.3491230  | 6.1589410  | 12.2976410 |
| C  | -1.5819260 | 4.6470170  | 12.1805310 | C  | 3.0269550  | 12.5204490 | 5.9146740  |
| C  | -2.5098190 | 5.2781060  | 11.3041790 | C  | 3.5956260  | 7.8482310  | 11.0808920 |
| C  | -2.5096560 | 2.3042770  | 12.1193650 | C  | 4.5642590  | 8.1748780  | 10.0772070 |
| H  | -2.5569910 | 2.3725140  | 11.0361110 | H  | 5.5369350  | 7.7134340  | 9.9762750  |
| C  | -2.0267290 | 3.3952170  | 12.8521000 | C  | 3.0980520  | 12.7956800 | 7.2840870  |
| C  | -2.0032080 | 9.3883620  | 7.8460730  | H  | 3.5194900  | 13.7261940 | 7.6475760  |
| H  | -2.7408840 | 9.8752990  | 7.2120960  | C  | 1.5588270  | 9.6796100  | 8.8055230  |
| C  | -3.5010240 | 7.5652350  | 8.7802450  | C  | 2.5928110  | 9.2108820  | 9.6585190  |
| C  | -4.7368580 | 7.8697820  | 8.0298540  | C  | 2.6160730  | 11.8622950 | 8.2003840  |
| C  | -7.0959120 | 8.4423120  | 6.5934520  | H  | 2.6611870  | 12.0837270 | 9.2630690  |
| C  | -0.7110420 | 9.8721140  | 7.9835180  | C  | 2.0395470  | 10.6552470 | 7.7853420  |
| H  | -0.4104820 | 10.7834550 | 7.4721540  | C  | 2.0928020  | 4.9198950  | 12.9111420 |
| C  | -6.4354180 | 9.4573590  | 7.2931490  | H  | 2.9178100  | 4.3030910  | 13.2562600 |
| H  | -6.8216680 | 10.4703630 | 7.3062350  | C  | 3.5826750  | 6.6855090  | 11.8845420 |
| C  | -3.7077590 | -1.1931520 | 14.1434550 | C  | 4.8473970  | 5.9276250  | 12.0667480 |
| H  | -3.9438460 | -1.9447380 | 14.8980490 | C  | 7.2734370  | 4.5168040  | 12.3547930 |
| H  | -4.6195470 | -0.9451620 | 13.5849980 | C  | 0.7841440  | 4.4451320  | 12.9667490 |
| H  | -2.9612610 | -1.6018530 | 13.4502730 | H  | 0.5876450  | 3.4337230  | 13.3128770 |
| C  | -1.9527290 | 3.2640140  | 14.2509950 | C  | 6.1671130  | 3.8982150  | 11.7631540 |
| H  | -1.5853060 | 4.0978280  | 14.8426540 | H  | 6.2250230  | 2.8796750  | 11.3959720 |
| C  | -6.5776860 | 7.1398950  | 6.6159850  | C  | 4.0457480  | 14.5824150 | 5.3184390  |
| H  | -7.0990390 | 6.3654190  | 6.0622180  | H  | 4.3296190  | 15.0839900 | 4.3919980  |
| C  | -2.3573610 | 2.1017220  | 14.8860720 | H  | 4.9404190  | 14.4374900 | 5.9377110  |
| H  | -2.3148690 | 2.0060000  | 15.9664200 | H  | 3.3304750  | 15.2116970 | 5.8635460  |
| C  | -5.4201320 | 6.8619580  | 7.3245310  | C  | 1.9795510  | 10.3976840 | 6.4031450  |
| H  | -5.0192980 | 5.8520960  | 7.3198440  | H  | 1.5591030  | 9.4578470  | 6.0558540  |
| C  | -8.7942890 | 9.9092030  | 5.8123540  | C  | 7.1674560  | 5.8439790  | 12.7917180 |
| H  | -9.0876500 | 10.2711470 | 6.8062420  | H  | 8.0347020  | 6.3104620  | 13.2482890 |
| H  | -8.1021550 | 10.6294090 | 5.3573060  | C  | 2.4677280  | 11.3096620 | 5.4809680  |
| H  | -9.6838100 | 9.8238100  | 5.1865560  | H  | 2.4338890  | 11.1069940 | 4.4150380  |
| Rh | 2.0802720  | 10.1377380 | 12.3249500 | C  | 5.9757860  | 6.5361730  | 12.6445560 |
| Te | 0.5022810  | 7.0121840  | 11.9839230 | H  | 5.9085170  | 7.5598700  | 12.9977200 |

Coordinates for 4-Rh(CO)<sub>2</sub>Cl-4

|    |            |            |            |    |            |            |            |
|----|------------|------------|------------|----|------------|------------|------------|
| C  | 8.6395610  | 2.5868160  | 12.1204330 | O  | 1.3686750  | 12.0550930 | 14.6678270 |
| H  | 8.4926250  | 2.4826440  | 11.0375800 | C  | 1.6286260  | 11.2898720 | 13.8506500 |
| H  | 7.9493130  | 1.9121930  | 12.6433050 | Cl | 0.1440200  | 10.9930770 | 11.4751150 |
| H  | 9.6654530  | 2.3116580  | 12.3694960 | Pt | -0.7542280 | 7.6657120  | 9.7011270  |
| O  | -3.2085410 | 0.2020420  | 15.1182560 | C  | 3.5326900  | 9.5318800  | 13.4756420 |
| O  | -8.1179990 | 8.4056990  | 5.6211420  | O  | 4.4581710  | 9.2934300  | 14.1235560 |
| N  | -2.2390470 | 6.3250710  | 10.3709820 |    |            |            |            |
| C  | -5.1963950 | 9.0816890  | 7.7688200  |    |            |            |            |
| H  | -4.7195430 | 9.9023950  | 8.2968660  |    |            |            |            |
| C  | 0.2245070  | 9.1828720  | 8.7727410  |    |            |            |            |
| C  | -3.9044100 | 5.0451660  | 11.2707960 | O  | 3.4307220  | 13.3523680 | 4.7736840  |
| H  | -4.3983490 | 4.3568340  | 11.9417050 | O  | 8.6455430  | 4.4412260  | 13.2107590 |
| C  | -2.2207450 | 8.2086180  | 8.5013610  | N  | 2.4047270  | 8.1215380  | 10.3536740 |
| C  | -2.8406680 | 1.2626500  | 14.3571270 | C  | 5.2415950  | 4.5579910  | 11.7975080 |
| C  | -3.4195640 | 6.5638670  | 9.7003520  | H  | 4.5231270  | 3.9140470  | 11.2983280 |
| C  | -4.4711930 | 5.7698200  | 10.2643110 | C  | -0.2777290 | 5.1610820  | 12.1755160 |
| H  | -5.5066400 | 5.7859790  | 9.9544700  | C  | 4.0129630  | 9.0383140  | 9.0290720  |
| C  | -2.9291400 | 1.3114440  | 12.9621550 | H  | 4.4623540  | 9.6108840  | 8.2299500  |
| H  | -3.3009580 | 0.4655820  | 12.3948520 | C  | 2.4073920  | 5.9241030  | 11.9467570 |
| C  | -1.5745550 | 4.7962380  | 12.2404040 | C  | 2.9952680  | 12.4729110 | 5.7117790  |
| C  | -2.4967340 | 5.3904490  | 11.3352560 | C  | 3.5997870  | 7.6039370  | 10.7083110 |
| C  | -2.5243680 | 2.4611950  | 12.2852800 | C  | 4.6418310  | 8.1979490  | 9.9009590  |
| H  | -2.5843160 | 2.4852700  | 11.2008120 | H  | 5.6962890  | 7.9636350  | 9.9528160  |
| C  | -2.0225250 | 3.5769030  | 12.9664930 | C  | 3.0118250  | 12.7053100 | 7.0904710  |
| C  | -1.9325790 | 9.3131730  | 7.6811590  | H  | 3.3829580  | 13.6394440 | 7.4969740  |
| H  | -2.6554400 | 9.7555530  | 6.9992220  | C  | 1.5571980  | 9.4641950  | 8.4517970  |
| C  | -3.4422060 | 7.5325930  | 8.6731250  | C  | 2.5798960  | 8.9385510  | 9.2871630  |
| C  | -4.6627230 | 7.7920010  | 7.8822170  | C  | 2.5415510  | 11.7221780 | 7.9612180  |
| C  | -6.9943740 | 8.2777740  | 6.3714070  | H  | 2.5544060  | 11.9123450 | 9.0309020  |
| C  | -0.6586910 | 9.8319400  | 7.8467580  | C  | 2.0361900  | 10.5050330 | 7.4913820  |
| H  | -0.3612550 | 10.7322050 | 7.3155470  | C  | 2.0743160  | 4.7490770  | 12.6293740 |
| C  | -6.3486690 | 9.3318900  | 7.0255710  | H  | 2.8576850  | 4.1091760  | 13.0267530 |
| H  | -6.7363150 | 10.3431700 | 6.9748180  | C  | 3.6356040  | 6.4856410  | 11.5847520 |
| C  | -3.7301260 | -0.9381630 | 14.4653620 | C  | 4.9324090  | 5.9079420  | 11.9997700 |
| H  | -3.9644070 | -1.6559710 | 15.2527370 | C  | 7.4225580  | 4.8511610  | 12.7921540 |
| H  | -4.6464710 | -0.7025370 | 13.9089940 | C  | 0.7347900  | 4.3490260  | 12.7152630 |
| H  | -2.9975420 | -1.3831930 | 13.7796820 | H  | 0.5000730  | 3.3715470  | 13.1292580 |
| C  | -1.9308500 | 3.5014200  | 14.3686060 | C  | 6.4704630  | 4.0260530  | 12.1842540 |
| H  | -1.5482000 | 4.3551990  | 14.9207660 | H  | 6.6765570  | 2.9782180  | 11.9970660 |
| C  | -6.4754370 | 6.9797730  | 6.4768920  | C  | 3.9399610  | 14.5952530 | 5.2136900  |
| H  | -6.9854000 | 6.1742870  | 5.9578100  | H  | 4.2293880  | 15.1390120 | 4.3132000  |
| C  | -2.3376790 | 2.3699430  | 15.0557120 | H  | 4.8212120  | 14.4681200 | 5.8557250  |
| H  | -2.2820840 | 2.3179150  | 16.1384630 | H  | 3.1818840  | 15.1752120 | 5.7557980  |
| C  | -5.3313730 | 6.7446280  | 7.2220090  | C  | 2.0303270  | 10.2910850 | 6.1014440  |
| H  | -4.9295350 | 5.7369320  | 7.2823000  | H  | 1.6601480  | 9.3468100  | 5.7114110  |
| C  | -8.6791310 | 9.6951270  | 5.4778660  | C  | 7.1299830  | 6.2068070  | 12.9970370 |
| H  | -8.9914370 | 10.1111410 | 6.4444550  | H  | 7.8776810  | 6.8322500  | 13.4742990 |
| H  | -7.9792720 | 10.3904950 | 4.9967100  | C  | 2.5035150  | 11.2539490 | 5.2237230  |
| H  | -9.5566720 | 9.5734670  | 4.8411800  | H  | 2.5086270  | 11.0851990 | 4.1513850  |
| Rh | 2.0333850  | 10.0664900 | 12.5375530 | C  | 5.9067390  | 6.7239260  | 12.6032600 |
| Te | 0.5191440  | 7.1621910  | 11.9797890 | H  | 5.6855560  | 7.7726480  | 12.7808130 |

Coordinates for 4-Rh(CO)<sub>2</sub>Cl-5

|    |            |            |            |    |            |            |            |
|----|------------|------------|------------|----|------------|------------|------------|
| C  | 8.9889960  | 3.0810230  | 13.0368070 | Pt | -0.8315060 | 7.5777650  | 9.4053830  |
| H  | 8.9982980  | 2.7976490  | 11.9763600 | C  | 0.2929720  | 7.2961160  | 14.7965910 |
| H  | 8.3041880  | 2.4177600  | 13.5807590 | O  | 0.2870780  | 6.5257550  | 15.6456710 |
| H  | 9.9944350  | 2.9692620  | 13.4450140 | Cl | 0.0167370  | 10.1958520 | 15.2119430 |
| O  | -3.3802560 | 0.3051810  | 14.9982200 | C  | 0.5003170  | 10.1897590 | 12.3063690 |
| O  | -8.3483680 | 8.6667270  | 5.7147510  | O  | 0.6218500  | 11.1431790 | 11.6853030 |
| N  | -2.3263050 | 6.3236410  | 10.1561700 |    |            |            |            |
| C  | -5.2736540 | 9.2149170  | 7.6751870  |    |            |            |            |
| H  | -4.7201050 | 10.0174020 | 8.1539930  |    |            |            |            |
| C  | 0.2009900  | 9.0275220  | 8.4260430  |    |            |            |            |
| C  | -3.9871310 | 5.1302770  | 11.1610910 | O  | 3.4471250  | 13.0583160 | 4.6512430  |
| H  | -4.4731140 | 4.4722480  | 11.8671020 | O  | 8.5278170  | 4.2036120  | 12.8826690 |
| C  | -2.3248520 | 8.2077690  | 8.2790040  | N  | 2.4598240  | 8.6246290  | 10.8474980 |
| C  | -2.9861380 | 1.3394770  | 14.2150420 | C  | 5.0393900  | 4.6954990  | 11.7941200 |
| C  | -3.5308420 | 6.6146500  | 9.5485740  | H  | 4.2430980  | 4.1643860  | 11.2805810 |
| C  | -4.5799110 | 5.8713460  | 10.1802700 | C  | -0.2481320 | 5.1637360  | 12.4354630 |
| H  | -5.6306760 | 5.9307150  | 9.9341090  | C  | 3.9245960  | 8.8582430  | 9.0999050  |
| C  | -3.0972670 | 1.3708220  | 12.8210610 | H  | 4.2906110  | 9.1241650  | 8.1182730  |
| H  | -3.5115440 | 0.5318990  | 12.2732350 | C  | 2.3261880  | 6.1885190  | 12.3663060 |
| C  | -1.6209720 | 4.7867330  | 12.0167220 | C  | 3.0232220  | 12.2904140 | 5.6852310  |
| C  | -2.5636170 | 5.4125170  | 11.1445290 | C  | 3.5717230  | 7.8465530  | 11.0770710 |
| C  | -2.6618270 | 2.4945180  | 12.1201130 | C  | 4.5241320  | 8.0427510  | 10.0211460 |
| H  | -2.7423170 | 2.5055380  | 11.0366590 | H  | 5.4656700  | 7.5191870  | 9.9300140  |
| C  | -2.1050220 | 3.5993020  | 12.7758430 | C  | 3.2835000  | 12.5556340 | 7.0338870  |
| C  | -1.9994190 | 9.2796830  | 7.4333740  | H  | 3.8547690  | 13.4268880 | 7.3337910  |
| H  | -2.7170600 | 9.7599060  | 6.7714430  | C  | 1.5547100  | 9.6505120  | 8.7605870  |
| C  | -3.5650330 | 7.5851420  | 8.5191700  | C  | 2.5988200  | 9.1448590  | 9.5849910  |
| C  | -4.8120730 | 7.8979270  | 7.7939180  | C  | 2.7991400  | 11.6889330 | 8.0114010  |
| C  | -7.1936730 | 8.4888470  | 6.4034420  | H  | 3.0042020  | 11.9035620 | 9.0567540  |
| C  | -0.6819530 | 9.7145250  | 7.5305960  | C  | 2.0346420  | 10.5602170 | 7.6847210  |
| H  | -0.3491990 | 10.5713270 | 6.9496300  | C  | 2.1004370  | 4.9250730  | 12.9481440 |
| C  | -6.4499770 | 9.5170480  | 6.9919650  | H  | 2.9406280  | 4.3296210  | 13.2932210 |
| H  | -6.7800060 | 10.5482860 | 6.9366260  | C  | 3.5524370  | 6.7299060  | 11.9496730 |
| C  | -3.9558370 | -0.8242170 | 14.3723590 | C  | 4.8352490  | 6.0209110  | 12.1961120 |
| H  | -4.2025550 | -1.5207290 | 15.1748700 | C  | 7.3059360  | 4.7329460  | 12.6263330 |
| H  | -4.8726480 | -0.5625150 | 13.8285750 | C  | 0.8119670  | 4.3993250  | 12.9634920 |
| H  | -3.2528260 | -1.3067210 | 13.6810920 | H  | 0.6457630  | 3.3754390  | 13.2880520 |
| C  | -1.9919780 | 3.5424970  | 14.1770630 | C  | 6.2571980  | 4.0497950  | 12.0013100 |
| H  | -1.5679830 | 4.3871860  | 14.7119050 | H  | 6.3787460  | 3.0271210  | 11.6623760 |
| C  | -6.7468550 | 7.1644230  | 6.5139860  | C  | 4.2071420  | 14.2137900 | 4.9466410  |
| H  | -7.3322390 | 6.3796260  | 6.0453380  | H  | 4.4392650  | 14.6756530 | 3.9859540  |
| C  | -2.4301190 | 2.4373250  | 14.8876940 | H  | 5.1436140  | 13.9619990 | 5.4606160  |
| H  | -2.3579910 | 2.4003910  | 15.9700390 | H  | 3.6400460  | 14.9252030 | 5.5603860  |
| C  | -5.5784380 | 6.8775990  | 7.2002230  | C  | 1.7932740  | 10.3087850 | 6.3199380  |
| H  | -5.2337550 | 5.8491920  | 7.2633990  | H  | 1.2340910  | 9.4220750  | 6.0349910  |
| C  | -8.8422410 | 9.9836960  | 5.5700120  | C  | 7.1212020  | 6.0643550  | 13.0234250 |
| H  | -9.0734500 | 10.4386960 | 6.5417030  | H  | 7.9451490  | 6.5814180  | 13.5048160 |
| H  | -8.1327560 | 10.6252720 | 5.0317780  | C  | 2.2789930  | 11.1537480 | 5.3359320  |
| H  | -9.7607520 | 9.8990060  | 4.9875850  | H  | 2.1042190  | 10.9526220 | 4.2836460  |
| Rh | 0.3338420  | 8.6626250  | 13.4639490 | C  | 5.9080610  | 6.6968720  | 12.8043470 |
| Te | 0.6310960  | 6.9853800  | 11.4807540 | H  | 5.7777300  | 7.7260630  | 13.1237310 |

Coordinates for 4-Rh(CO)<sub>2</sub>Cl-6

|   |            |            |            |    |            |            |            |
|---|------------|------------|------------|----|------------|------------|------------|
| C | 8.7662760  | 2.8620830  | 12.5062700 | C  | -0.7163920 | 9.9249790  | 7.9654910  |
| H | 8.6754590  | 2.7230550  | 11.4212010 | H  | -0.4215230 | 10.8307200 | 7.4412380  |
| H | 8.0828920  | 2.1708150  | 13.0160970 | C  | -6.4405350 | 9.4893590  | 7.3206130  |
| H | 9.7905000  | 2.6411370  | 12.8099150 | H  | -6.8346030 | 10.4993020 | 7.3342510  |
| O | -3.1052400 | -0.0749540 | 14.7985480 | C  | -3.5980480 | -1.1876350 | 14.0788260 |
| O | -8.2320330 | 8.6313230  | 5.9017460  | H  | -3.8216390 | -1.9531940 | 14.8230810 |
| N | -2.2515430 | 6.3363120  | 10.4221500 | H  | -4.5157890 | -0.9404490 | 13.5299000 |
| C | -5.2723030 | 9.2054400  | 8.0256470  | H  | -2.8516330 | -1.5777160 | 13.3749050 |
| H | -4.7891460 | 9.9989360  | 8.5885280  | C  | -1.8952590 | 3.2880150  | 14.2474910 |
| C | 0.1991260  | 9.2236550  | 8.8178010  | H  | -1.5374970 | 4.1178480  | 14.8505750 |
| C | -3.8888490 | 4.9793380  | 11.2585470 | C  | -6.5653300 | 7.1706800  | 6.6433090  |
| H | -4.3639140 | 4.2434680  | 11.8914670 | H  | -7.0810330 | 6.3923030  | 6.0897500  |
| C | -2.2754850 | 8.3054930  | 8.6350360  | C  | -2.2821830 | 2.1109530  | 14.8659600 |
| C | -2.7555680 | 1.0342450  | 14.1017050 | H  | -2.2340520 | 1.9993620  | 15.9445280 |
| C | -3.4450470 | 6.6009250  | 9.7826750  | C  | -5.4056320 | 6.9014650  | 7.3516660  |
| C | -4.4793080 | 5.7609670  | 10.3104310 | H  | -4.9972490 | 5.8946180  | 7.3470520  |
| H | -5.5191500 | 5.7836260  | 10.0163470 | C  | -8.8049350 | 9.9226090  | 5.8431150  |
| C | -2.8356680 | 1.1599480  | 12.7108760 | H  | -9.1000600 | 10.2804980 | 6.8378640  |
| H | -3.1856860 | 0.3399170  | 12.0939660 | H  | -8.1198170 | 10.6493420 | 5.3879400  |
| C | -1.5518520 | 4.7065160  | 12.1974540 | H  | -9.6944590 | 9.8298720  | 5.2184230  |
| C | -2.4846980 | 5.3383370  | 11.3270800 | Rh | 1.6576450  | 9.7794370  | 12.4743780 |
| C | -2.4510880 | 2.3543290  | 12.1032950 | Te | 0.4617200  | 7.1327350  | 12.0563910 |
| H | -2.5043910 | 2.4386820  | 11.0214170 | Pt | -0.7784470 | 7.7074250  | 9.7689370  |
| C | -1.9781390 | 3.4396630  | 12.8509690 | C  | 0.4744820  | 10.9052740 | 11.4526290 |
| C | -2.0093840 | 9.4394380  | 7.8491870  | O  | -0.1674470 | 11.7360350 | 10.9915220 |
| H | -2.7557180 | 9.9173520  | 7.2188010  | Cl | 0.7764550  | 10.9550480 | 14.3190600 |
| C | -3.4926570 | 7.6203050  | 8.8083020  | C  | 3.1261810  | 9.4233140  | 13.6305950 |
| C | -4.7301710 | 7.9147030  | 8.0566220  | O  | 4.0104940  | 9.3797350  | 14.3633380 |
| C | -7.0935680 | 8.4691690  | 6.6211880  |    |            |            |            |

## 5. References

- (1) G. M. Sheldrick, *Acta Crystallogr. Sect. A Found. Crystallogr.* 2008, **64**, 112–122.
- (2) G. M. Sheldrick, *Acta Crystallogr. Sect. C Struct. Chem.* 2015, **71**, 3–8.
- (3) E. Pacholska-Dudziak, G. Vetter, A. Góratowska, A. Białońska, L. Latos-Grażyński, *Chem. Eur. J.* 2020, **26**, 16011–16018.
- (4) E. Pacholska-Dudziak, L. Szterenber, L. Latos-Grażyński, *Chem. Eur. J.* 2011, **17**, 3500–3511.
- (5) Y.-S. Lin, G.-D. Li, S.-P. Mao, J.-D. Chai, *J. Chem. Theory Comput.* 2013, **9**, 263–272.
- (6) F. Weigend and R. Ahlrichs, *Phys. Chem. Chem. Phys.* 2005, **7**, 3297–3305.
- (7) F. Neese, F. Wennmohs, A. Hansen, U. Becker, *Chem. Phys.* 2009, **356**, 98–109.
- (8) F. Neese, *WIREs: Comput. Mol. Sci.* 2017, **8**, e1327.
- (9) W. Zou, Molden2AIM script, <https://github.com/zorkzou/Molden2AIM> accessed on 2023/11/14.
- (10) E. D. Glendening, C. R. Landis, F. Weinhold, *J. Comput. Chem.* 2013, **34**, 1363–1374.
- (11) T. A. Keith, T. K. Grismill, AIMAll (Version 16.10.31) Software, Overland Park KS, USA, 2016 (<http://aim.tkgrismill.com>).

- (12) T. Lu, F. Chen, *J. Comput. Chem.* 2012, **33**, 580–592.
- (13) M. J. Frisch, G. W. Trucks, H. B. Schlegel, G. E. Scuseria, M. A. Robb, J. R. Cheeseman, G. Scalmani, V. Barone, G. A. Petersson, H. Nakatsuji, X. Li, M. Caricato, A. V. Marenich, J. Bloino, B. G. Janesko, R. Gomperts, B. Mennucci, H. P. Hratchian, J. V. Ortiz, A. F. Izmaylov, J. L. Sonnenberg, D. Williams-Young, F. Ding, F. Lipparini, F. Egidi, J. Goings, B. Peng, A. Petrone, T. Henderson, D. Ranasinghe, V. G. Zakrzewski, J. Gao, N. Rega, G. Zheng, W. Liang, M. Hada, M. Ehara, K. Toyota, R. Fukuda, J. Hasegawa, M. Ishida, T. Nakajima, Y. Honda, O. Kitao, H. Nakai, T. Vreven, K. Throssell, J. A. Montgomery, Jr., J. E. Peralta, F. Ogliaro, M. J. Bearpark, J. J. Heyd, E. N. Brothers, K. N. Kudin, V. N. Staroverov, T. A. Keith, R. Kobayashi, J. Normand, K. Raghavachari, A. P. Rendell, J. C. Burant, S. S. Iyengar, J. Tomasi, M. Cossi, J. M. Millam, M. Klene, C. Adamo, R. Cammi, J. W. Ochterski, R. L. Martin, K. Morokuma, O. Farkas, J. B. Foresman, and D. J. Fox, *Gaussian, Inc.*, Wallingford CT, 2016.
- (14) G. Vetter, A. Białońska, P. Krzyszowska, S. Koniarz, E. Pacholska-Dudziak, *Chem. Eur. J.* 2022, **28**, e202201513.
- (15) T. Sarma, B. S. Kumar, P. K. Panda, *Angew. Chem. Int. Ed.* 2015, **54**, 14835–14839.
- (16) R. F. W. Bader, *Chem. Rev.* 1991, **91**, 893–928.
- (17) C. Lepetit, P. Fau, K. Fajerweg, M. L. Kahn, B. Silvi, *Coord. Chem. Rev.* 2017, **345**, 150–181.
- (18) A. E. Reed, F. Weinhold, *J. Chem. Phys.* 1983, **78**, 4066–4073.
- (19) A. Srinivasan, M. Toganoh, T. Niino, A. Osuka, H. Furuta, *Inorg. Chem.* 2008, **47**, 11305–11313.
- (20) C. R. Groom, I. J. Bruno, M. P. Lightfoot, S. C. Ward, *Acta Crystallogr. Sect. B Struct. Sci. Cryst. Eng. Mater.* 2016, **72**, 171–179.
